# Supplementary material
Source: bioRxiv or medRxiv preprint supplement (https://medrxiv.org/highwire/filestream/72024/field_highwire_adjunct_files/0/2020.02.10.20021758-1.pdf)
Supplement: Supplementary file [file 2020.02.10.20021758-1.pdf]

| Metabolite name                        | Subpathway name | Superpathway name        | Fold change | p value (FDR) | p value (uncorr) | HMDB ID   |
|----------------------------------------|-----------------|--------------------------|-------------|---------------|------------------|-----------|
| alanine                                | Amino Acid      | Alanine/Aspartate        | 1.04        | 4.64E-01      | 2.25E-01         |           |
| asparagine                             | Amino Acid      | Alanine/Aspartate        | 0.93        | 3.07E-01      | 8.87E-02         |           |
| aspartate                              | Amino Acid      | Alanine/Aspartate        | 1.28        | 3.14E-02      | 2.84E-03         |           |
| N-acetylalanine                        | Amino Acid      | Alanine/Aspartate        | 1.01        | 3.11E-01      | 9.32E-02         |           |
| N-acetylaspartate (NAA)                | Amino Acid      | Alanine/Aspartate        | 0.97        | 8.62E-01      | 7.50E-01         |           |
| N-carbamoylalanine                     | Amino Acid      | Alanine/Aspartate        | 1.11        | 6.96E-01      | 4.67E-01         |           |
| N-methylalanine                        | Amino Acid      | Alanine/Aspartate        | 1.59        | 3.97E-01      | 1.72E-01         | HMDB01906 |
| creatine                               | Amino Acid      | Creatine                 | 0.88        | 8.62E-01      | 7.50E-01         | HMDB00064 |
| creatinine                             | Amino Acid      | Creatine                 | 1.02        | 4.23E-01      | 1.91E-01         | HMDB00562 |
| guanidinoacetate                       | Amino Acid      | Creatine                 | 0.73        | 5.73E-06      | 1.14E-07         | HMDB00128 |
| 4-hydroxyglutamate                     | Amino Acid      | Glutamate                | 1.32        | 5.17E-01      | 2.79E-01         | HMDB01344 |
| beta-citrylglutamate                   | Amino Acid      | Glutamate                | 1.47        | 6.33E-05      | 1.93E-06         |           |
| carboxyethyl-GABA                      | Amino Acid      | Glutamate                | 0.67        | 6.56E-02      | 7.57E-03         | HMDB02201 |
| glutamate                              | Amino Acid      | Glutamate                | 1.09        | 4.36E-01      | 2.01E-01         | HMDB00148 |
| glutamine                              | Amino Acid      | Glutamate                | 0.99        | 8.79E-01      | 7.74E-01         | HMDB00641 |
| N-acetylglutamate                      | Amino Acid      | Glutamate                | 0.94        | 8.62E-01      | 7.51E-01         | HMDB01138 |
| N-acetylglutamine                      | Amino Acid      | Glutamate                | 1.06        | 6.66E-01      | 4.18E-01         | HMDB06029 |
| pyroglutamine*                         | Amino Acid      | Glutamate                | 1.51        | 4.78E-02      | 5.20E-03         |           |
| 1-pyrroline-5-carboxylate              | Amino Acid      | Glutamate                | 1.60        | 3.14E-03      | 1.58E-04         | HMDB01301 |
| 2-aminobutyrate                        | Amino Acid      | Glutathione              | 0.77        | 2.19E-03      | 9.57E-05         | HMDB00650 |
| 2-hydroxybutyrate/2-hydroxyisobutyrate | Amino Acid      | Glutathione              | 0.82        | 3.96E-01      | 1.70E-01         |           |
| 5-oxoproline                           | Amino Acid      | Glutathione              | 0.96        | 9.09E-01      | 8.17E-01         | HMDB00267 |
| cys-gly, oxidized                      | Amino Acid      | Glutathione              | 0.80        | 4.07E-01      | 1.79E-01         |           |
| cysteine-glutathione disulfide         | Amino Acid      | Glutathione              | 1.17        | 4.03E-01      | 1.76E-01         | HMDB00656 |
| cysteinylglycine                       | Amino Acid      | Glutathione              | 0.90        | 7.35E-01      | 5.33E-01         | HMDB00078 |
| 2-methylserine                         | Amino Acid      | Glycine/Serine/Threonine | 0.51        | 7.02E-11      | 9.31E-14         |           |
| betaine                                | Amino Acid      | Glycine/Serine/Threonine | 0.87        | 3.71E-01      | 1.45E-01         | HMDB00043 |
| dimethylglycine                        | Amino Acid      | Glycine/Serine/Threonine | 1.01        | 7.50E-01      | 5.67E-01         | HMDB00092 |

|                                |            |                           |      |          |          |           |
|--------------------------------|------------|---------------------------|------|----------|----------|-----------|
| glycine                        | Amino Acid | Glycine/Serine/Threonine  | 1.01 | 4.13E-01 | 1.83E-01 | HMDB00123 |
| N-acetylglycine                | Amino Acid | Glycine/Serine/Threonine  | 0.65 | 3.11E-01 | 9.33E-02 | HMDB00532 |
| N-acetylserine                 | Amino Acid | Glycine/Serine/Threonine  | 1.01 | 3.31E-01 | 1.09E-01 | HMDB02931 |
| N-acetylthreonine              | Amino Acid | Glycine/Serine/Threonine  | 1.08 | 2.64E-01 | 6.54E-02 |           |
| sarcosine                      | Amino Acid | Glycine/Serine/Threonine  | 0.76 | 9.13E-08 | 8.48E-10 | HMDB00271 |
| serine                         | Amino Acid | Glycine/Serine/Threonine  | 0.90 | 3.11E-01 | 9.20E-02 | HMDB00187 |
| threonine                      | Amino Acid | Glycine/Serine/Threonine  | 0.96 | 8.14E-01 | 6.47E-01 | HMDB00167 |
| 4-guanidinobutanoate           | Amino Acid | Guanidino/Acetamido       | 1.38 | 3.63E-01 | 1.39E-01 | HMDB03464 |
| 1-methylhistidine              | Amino Acid | Histidine                 | 1.10 | 5.53E-01 | 3.14E-01 | HMDB00001 |
| 1-methylimidazoleacetate       | Amino Acid | Histidine                 | 1.29 | 3.03E-01 | 8.65E-02 | HMDB02820 |
| 3-methylhistidine              | Amino Acid | Histidine                 | 0.95 | 8.55E-01 | 7.26E-01 | HMDB00479 |
| formiminoglutamate             | Amino Acid | Histidine                 | 1.07 | 7.62E-01 | 5.79E-01 | HMDB00854 |
| histidine                      | Amino Acid | Histidine                 | 0.98 | 7.35E-01 | 5.36E-01 | HMDB00177 |
| hydantoin-5-propionic acid     | Amino Acid | Histidine                 | 1.27 | 3.40E-01 | 1.16E-01 | HMDB01212 |
| imidazole lactate              | Amino Acid | Histidine                 | 0.93 | 5.59E-01 | 3.22E-01 | HMDB02320 |
| imidazole propionate           | Amino Acid | Histidine                 | 1.31 | 2.20E-01 | 4.84E-02 | HMDB02271 |
| N-acetyl-1-methylhistidine*    | Amino Acid | Histidine                 | 1.25 | 8.44E-01 | 7.00E-01 |           |
| N-acetyl-3-methylhistidine*    | Amino Acid | Histidine                 | 0.80 | 5.17E-01 | 2.73E-01 |           |
| N-acetylcarnosine              | Amino Acid | Histidine                 | 0.83 | 2.13E-01 | 4.51E-02 | HMDB12881 |
| N-acetylhistidine              | Amino Acid | Histidine                 | 1.18 | 5.17E-01 | 2.80E-01 | HMDB32055 |
| 2,3-dihydroxy-2-methylbutyrate | Amino Acid | Leucine/Isoleucine/Valine | 1.06 | 7.43E-01 | 5.57E-01 | HMDB29576 |
| 2-hydroxy-3-methylvalerate     | Amino Acid | Leucine/Isoleucine/Valine | 0.99 | 9.58E-01 | 9.15E-01 | HMDB00317 |
| 2-methylbutyrylcarnitine (C5)  | Amino Acid | Leucine/Isoleucine/Valine | 0.98 | 8.34E-01 | 6.86E-01 | HMDB00378 |
| 3-hydroxy-2-ethylpropionate    | Amino Acid | Leucine/Isoleucine/Valine | 0.95 | 7.72E-01 | 5.97E-01 | HMDB00396 |
| 3-hydroxyisobutyrate           | Amino Acid | Leucine/Isoleucine/Valine | 0.83 | 3.97E-01 | 1.72E-01 | HMDB00336 |

|                                |            |                           |      |          |          |           |
|--------------------------------|------------|---------------------------|------|----------|----------|-----------|
| 3-methyl-2-oxobutyrate         | Amino Acid | Leucine/Isoleucine/Valine | 0.87 | 9.42E-02 | 1.27E-02 | HMDB00019 |
| 3-methyl-2-oxovalerate         | Amino Acid | Leucine/Isoleucine/Valine | 0.93 | 3.84E-01 | 1.60E-01 | HMDB03736 |
| 3-methylglutaconate            | Amino Acid | Leucine/Isoleucine/Valine | 1.02 | 7.08E-01 | 4.77E-01 | HMDB00522 |
| 3-methylglutaryl carnitine (2) | Amino Acid | Leucine/Isoleucine/Valine | 1.26 | 3.11E-01 | 9.25E-02 | HMDB00552 |
| 4-methyl-2-oxopentanoate       | Amino Acid | Leucine/Isoleucine/Valine | 0.89 | 1.15E-01 | 1.66E-02 | HMDB00695 |
| alpha-hydroxyisocaproate       | Amino Acid | Leucine/Isoleucine/Valine | 0.93 | 4.28E-01 | 1.94E-01 | HMDB00746 |
| alpha-hydroxyisovalerate       | Amino Acid | Leucine/Isoleucine/Valine | 0.93 | 7.73E-01 | 5.99E-01 | HMDB00407 |
| beta-hydroxyisovalerate        | Amino Acid | Leucine/Isoleucine/Valine | 1.02 | 8.19E-01 | 6.55E-01 | HMDB00754 |
| ethylmalonate                  | Amino Acid | Leucine/Isoleucine/Valine | 0.78 | 3.97E-01 | 1.72E-01 | HMDB00622 |
| isobutyryl carnitine (C4)      | Amino Acid | Leucine/Isoleucine/Valine | 1.03 | 8.41E-01 | 6.95E-01 | HMDB00736 |
| isobutyrylglycine              | Amino Acid | Leucine/Isoleucine/Valine | 1.07 | 8.19E-01 | 6.64E-01 | HMDB00730 |
| isoleucine                     | Amino Acid | Leucine/Isoleucine/Valine | 1.02 | 5.82E-01 | 3.42E-01 | HMDB00172 |
| isovalerate (i5:0)             | Amino Acid | Leucine/Isoleucine/Valine | 1.01 | 9.63E-01 | 9.26E-01 | HMDB00718 |
| isovaleryl carnitine (C5)      | Amino Acid | Leucine/Isoleucine/Valine | 0.86 | 3.75E-01 | 1.48E-01 | HMDB00688 |
| isovalerylglycine              | Amino Acid | Leucine/Isoleucine/Valine | 0.94 | 9.46E-01 | 8.85E-01 | HMDB00678 |
| leucine                        | Amino Acid | Leucine/Isoleucine/Valine | 1.01 | 7.43E-01 | 5.59E-01 | HMDB00687 |
| N-acetyl isoleucine            | Amino Acid | Leucine/Isoleucine/Valine | 1.33 | 5.89E-01 | 3.48E-01 | HMDB61684 |
| N-acetyl leucine               | Amino Acid | Leucine/Isoleucine/Valine | 1.02 | 9.76E-01 | 9.42E-01 | HMDB11756 |
| N-acetyl valine                | Amino Acid | Leucine/Isoleucine/Valine | 1.00 | 4.85E-01 | 2.48E-01 | HMDB11757 |

|                               |            |                                 |      |          |          |           |
|-------------------------------|------------|---------------------------------|------|----------|----------|-----------|
| tiglylcarnitine (C5:1-DC)     | Amino Acid | Leucine/Isoleucine/Valine       | 0.79 | 4.08E-02 | 4.17E-03 | HMDB02366 |
| valine                        | Amino Acid | Leucine/Isoleucine/Valine       | 0.99 | 9.47E-01 | 8.92E-01 | HMDB00883 |
| 2-aminoadipate                | Amino Acid | Lysine                          | 0.77 | 1.88E-01 | 3.74E-02 | HMDB00510 |
| 5-(galactosylhydroxy)-lysine  | Amino Acid | Lysine                          | 1.24 | 5.92E-02 | 6.59E-03 |           |
| 5-hydroxylysine               | Amino Acid | Lysine                          | 1.20 | 1.15E-01 | 1.74E-02 | HMDB00450 |
| 6-oxopiperidine-2-carboxylate | Amino Acid | Lysine                          | 0.98 | 7.04E-01 | 4.73E-01 | HMDB61705 |
| glutaryl carnitine (C5-DC)    | Amino Acid | Lysine                          | 1.13 | 3.26E-01 | 1.00E-01 | HMDB13130 |
| lysine                        | Amino Acid | Lysine                          | 0.95 | 4.93E-01 | 2.54E-01 | HMDB00182 |
| N-trimethyl 5-aminovalerate   | Amino Acid | Lysine                          | 1.03 | 6.91E-01 | 4.59E-01 |           |
| N6,N6,N6-trimethyllysine      | Amino Acid | Lysine                          | 1.02 | 8.20E-01 | 6.69E-01 | HMDB01325 |
| N6-acetyllysine               | Amino Acid | Lysine                          | 1.02 | 4.65E-01 | 2.27E-01 | HMDB00206 |
| pipecolate                    | Amino Acid | Lysine                          | 0.82 | 7.35E-01 | 5.37E-01 | HMDB00070 |
| alpha-ketobutyrate            | Amino Acid | Methionine/Cysteine/Sam/Taurine | 0.38 | 2.53E-10 | 1.01E-12 | HMDB00005 |
| cystathionine                 | Amino Acid | Methionine/Cysteine/Sam/Taurine | 0.84 | 5.16E-01 | 2.72E-01 | HMDB00099 |
| cysteine                      | Amino Acid | Methionine/Cysteine/Sam/Taurine | 1.09 | 2.83E-01 | 7.38E-02 | HMDB00574 |
| cysteine sulfate              | Amino Acid | Methionine/Cysteine/Sam/Taurine | 0.86 | 2.89E-01 | 7.71E-02 | HMDB00731 |
| cysteine sulfinic acid        | Amino Acid | Methionine/Cysteine/Sam/Taurine | 1.02 | 9.98E-01 | 9.97E-01 | HMDB00996 |
| cystine                       | Amino Acid | Methionine/Cysteine/Sam/Taurine | 1.13 | 2.96E-01 | 8.17E-02 | HMDB00192 |
| hypotaurine                   | Amino Acid | Methionine/Cysteine/Sam/Taurine | 1.98 | 1.03E-06 | 1.51E-08 | HMDB00965 |
| methionine                    | Amino Acid | Methionine/Cysteine/Sam/Taurine | 1.00 | 9.92E-01 | 9.75E-01 | HMDB00696 |
| methionine sulfone            | Amino Acid | Methionine/Cysteine/Sam/Taurine | 1.23 | 4.21E-02 | 4.41E-03 |           |
| methionine sulfoxide          | Amino Acid | Methionine/Cysteine/Sam/Taurine | 1.13 | 2.38E-01 | 5.58E-02 | HMDB02005 |
| N-acetylmethionine            | Amino Acid | Methionine/Cysteine/Sam/Taurine | 1.22 | 9.61E-03 | 6.25E-04 | HMDB11745 |
| N-acetyltaurine               | Amino Acid | Methionine/Cysteine/Sam/Taurine | 1.18 | 2.57E-01 | 6.24E-02 |           |

|                                |            |                                     |      |          |          |           |
|--------------------------------|------------|-------------------------------------|------|----------|----------|-----------|
| N-formylmethionine             | Amino Acid | Methionine/Cysteine/<br>Sam/Taurine | 1.06 | 2.65E-01 | 6.65E-02 | HMDB01015 |
| N-methyltaurine                | Amino Acid | Methionine/Cysteine/<br>Sam/Taurine | 1.26 | 5.76E-01 | 3.38E-01 |           |
| adenosylhomocysteine (SAH)     | Amino Acid | Methionine/Cysteine/<br>Sam/Taurine | 1.15 | 1.88E-01 | 3.70E-02 | HMDB00939 |
| methylcysteine                 | Amino Acid | Methionine/Cysteine/<br>Sam/Taurine | 0.89 | 8.52E-01 | 7.21E-01 | HMDB02108 |
| methylcysteine sulfoxide       | Amino Acid | Methionine/Cysteine/<br>Sam/Taurine | 0.91 | 9.28E-01 | 8.58E-01 | HMDB29432 |
| methylmethionine               | Amino Acid | Methionine/Cysteine/<br>Sam/Taurine | 1.16 | 7.19E-01 | 4.99E-01 | HMDB38670 |
| taurine                        | Amino Acid | Sam/Taurine                         | 1.63 | 7.68E-08 | 5.14E-10 | HMDB00251 |
| 4-hydroxyphenylacetate         | Amino Acid | Phenylalanine                       | 1.07 | 3.83E-01 | 1.59E-01 | HMDB00020 |
| N-acetylphenylalanine          | Amino Acid | Phenylalanine                       | 1.08 | 7.62E-01 | 5.78E-01 | HMDB00512 |
| phenylacetate                  | Amino Acid | Phenylalanine                       | 1.36 | 1.98E-01 | 4.04E-02 | HMDB00209 |
| phenylalanine                  | Amino Acid | Phenylalanine                       | 1.03 | 3.03E-01 | 8.61E-02 | HMDB00159 |
| phenyllactate (PLA)            | Amino Acid | Phenylalanine                       | 1.09 | 5.49E-01 | 3.08E-01 | HMDB00779 |
| phenylpyruvate                 | Amino Acid | Phenylalanine                       | 1.07 | 6.79E-01 | 4.38E-01 | HMDB00205 |
| (N(1) + N(8))-acetylspermidine | Amino Acid | Polyamine                           | 1.24 | 5.21E-02 | 5.74E-03 |           |
| 4-acetamidobutanoate           | Amino Acid | Polyamine                           | 1.23 | 1.92E-01 | 3.85E-02 | HMDB03681 |
| 5-methylthioadenosine (MTA)    | Amino Acid | Polyamine                           | 1.24 | 5.34E-03 | 2.91E-04 | HMDB01173 |
| acisoga                        | Amino Acid | Polyamine                           | 1.01 | 4.52E-01 | 2.15E-01 |           |
| N-acetylputrescine             | Amino Acid | Polyamine                           | 1.19 | 2.10E-02 | 1.61E-03 | HMDB02064 |
| spermidine                     | Amino Acid | Polyamine                           | 3.42 | 1.12E-04 | 3.69E-06 | HMDB01257 |
| 3-indoxyl sulfate              | Amino Acid | Tryptophan                          | 1.25 | 3.34E-01 | 1.13E-01 | HMDB00682 |
| 5-bromotryptophan              | Amino Acid | Tryptophan                          | 1.01 | 8.16E-01 | 6.49E-01 |           |
| 5-hydroxyindoleacetate         | Amino Acid | Tryptophan                          | 1.60 | 3.26E-01 | 1.02E-01 | HMDB00763 |
| anthranilate                   | Amino Acid | Tryptophan                          | 1.20 | 3.03E-01 | 8.52E-02 | HMDB01123 |
| C-glycosyltryptophan           | Amino Acid | Tryptophan                          | 1.18 | 1.44E-01 | 2.48E-02 |           |
| indole-3-carboxylic acid       | Amino Acid | Tryptophan                          | 1.29 | 2.58E-01 | 6.31E-02 | HMDB03320 |
| indoleacetate                  | Amino Acid | Tryptophan                          | 1.08 | 8.14E-01 | 6.44E-01 | HMDB00197 |
| indoleacetylglutamine          | Amino Acid | Tryptophan                          | 1.23 | 7.12E-01 | 4.83E-01 | HMDB13240 |
| indolelactate                  | Amino Acid | Tryptophan                          | 0.96 | 4.85E-01 | 2.47E-01 | HMDB00671 |
| indolepropionate               | Amino Acid | Tryptophan                          | 0.98 | 6.11E-01 | 3.68E-01 | HMDB02302 |
| kynurenate                     | Amino Acid | Tryptophan                          | 0.89 | 3.44E-01 | 1.19E-01 | HMDB00715 |

|                            |            |                                 |       |          |          |           |
|----------------------------|------------|---------------------------------|-------|----------|----------|-----------|
| kynurenine                 | Amino Acid | Tryptophan                      | 1.07  | 2.73E-01 | 6.97E-02 | HMDB00684 |
| N-acetylkynurenine (2)     | Amino Acid | Tryptophan                      | 1.20  | 9.92E-01 | 9.76E-01 |           |
| N-acetyltryptophan         | Amino Acid | Tryptophan                      | 0.98  | 7.25E-01 | 5.14E-01 | HMDB13713 |
| N-formylanthranilic acid   | Amino Acid | Tryptophan                      | 1.25  | 5.03E-01 | 2.61E-01 | HMDB04089 |
| picolinate                 | Amino Acid | Tryptophan                      | 0.93  | 5.53E-01 | 3.12E-01 | HMDB02243 |
| serotonin                  | Amino Acid | Tryptophan                      | 10.71 | 1.22E-05 | 3.23E-07 | HMDB00259 |
| tryptophan                 | Amino Acid | Tryptophan                      | 0.95  | 3.88E-01 | 1.65E-01 | HMDB00929 |
| tryptophan betaine         | Amino Acid | Tryptophan                      | 0.45  | 5.90E-03 | 3.50E-04 | HMDB61115 |
| xanthurenate               | Amino Acid | Tryptophan                      | 0.82  | 1.73E-01 | 3.24E-02 | HMDB00881 |
| 2-hydroxyphenylacetate     | Amino Acid | Tyrosine                        | 1.36  | 1.88E-01 | 3.74E-02 | HMDB00669 |
| 3-(4-hydroxyphenyl)lactate | Amino Acid | Tyrosine                        | 0.90  | 3.40E-01 | 1.17E-01 | HMDB00755 |
| 3-methoxytyramine sulfate  | Amino Acid | Tyrosine                        | 9.94  | 3.44E-01 | 1.20E-01 |           |
| 3-methoxytyrosine          | Amino Acid | Tyrosine                        | 26.56 | 3.11E-01 | 9.14E-02 | HMDB01434 |
| 4-hydroxyphenylpyruvate    | Amino Acid | Tyrosine                        | 1.16  | 3.31E-01 | 1.10E-01 | HMDB00707 |
| dopamine 3-O-sulfate       | Amino Acid | Tyrosine                        | 3.86  | 2.01E-01 | 4.23E-02 | HMDB06275 |
| dopamine 4-sulfate         | Amino Acid | Tyrosine                        | 5.37  | 2.34E-01 | 5.44E-02 | HMDB04148 |
| gentisate                  | Amino Acid | Tyrosine                        | 1.02  | 9.94E-01 | 9.82E-01 | HMDB00152 |
| homovanillate (HVA)        | Amino Acid | Tyrosine                        | 2.35  | 3.53E-01 | 1.30E-01 | HMDB00118 |
| N-acetyltyrosine           | Amino Acid | Tyrosine                        | 0.91  | 3.61E-01 | 1.35E-01 | HMDB00866 |
| N-formylphenylalanine      | Amino Acid | Tyrosine                        | 0.91  | 8.41E-01 | 6.96E-01 |           |
| p-cresol-glucuronide*      | Amino Acid | Tyrosine                        | 1.58  | 1.44E-01 | 2.49E-02 | HMDB11686 |
| phenol sulfate             | Amino Acid | Tyrosine                        | 1.51  | 3.48E-01 | 1.25E-01 | HMDB60015 |
| thyroxine                  | Amino Acid | Tyrosine                        | 1.01  | 5.45E-01 | 3.03E-01 | HMDB01918 |
| tyramine O-sulfate         | Amino Acid | Tyrosine                        | 1.19  | 5.22E-01 | 2.84E-01 | HMDB06409 |
| tyrosine                   | Amino Acid | Tyrosine                        | 0.97  | 8.57E-01 | 7.34E-01 | HMDB00158 |
| vanillactate               | Amino Acid | Tyrosine                        | 20.90 | 3.82E-01 | 1.57E-01 | HMDB00913 |
| vanillylmandelate (VMA)    | Amino Acid | Tyrosine                        | 1.16  | 2.23E-01 | 5.00E-02 | HMDB00291 |
| 2-oxoarginine*             | Amino Acid | Urea Cycle;<br>Arginine/Proline | 0.96  | 8.90E-01 | 7.93E-01 | HMDB04225 |
| argininate*                | Amino Acid | Urea Cycle;<br>Arginine/Proline | 0.84  | 4.16E-01 | 1.85E-01 | HMDB03148 |
| arginine                   | Amino Acid | Urea Cycle;<br>Arginine/Proline | 1.05  | 7.35E-01 | 5.43E-01 | HMDB00517 |
| citrulline                 | Amino Acid | Urea Cycle;<br>Arginine/Proline | 0.90  | 3.01E-01 | 8.34E-02 | HMDB00904 |

|                                           |              |                                   |      |          |          |           |
|-------------------------------------------|--------------|-----------------------------------|------|----------|----------|-----------|
| dimethylarginine (SDMA + ADMA)            | Amino Acid   | Urea Cycle;<br>Arginine/Proline   | 1.03 | 1.95E-01 | 3.92E-02 | HMDB01539 |
| homoarginine                              | Amino Acid   | Urea Cycle;<br>Arginine/Proline   | 0.79 | 5.78E-03 | 3.30E-04 | HMDB00670 |
| homocitrulline                            | Amino Acid   | Urea Cycle;<br>Arginine/Proline   | 1.27 | 3.59E-01 | 1.34E-01 | HMDB00679 |
| N-acetylarginine                          | Amino Acid   | Urea Cycle;<br>Arginine/Proline   | 0.93 | 7.13E-01 | 4.85E-01 | HMDB04620 |
| N-acetylcitrulline                        | Amino Acid   | Urea Cycle;<br>Arginine/Proline   | 1.12 | 9.25E-01 | 8.43E-01 | HMDB00856 |
| N-acetylproline                           | Amino Acid   | Urea Cycle;<br>Arginine/Proline   | 1.21 | 7.19E-01 | 5.02E-01 |           |
| N-delta-acetylornithine                   | Amino Acid   | Urea Cycle;<br>Arginine/Proline   | 0.92 | 9.83E-01 | 9.59E-01 |           |
| N-methylproline                           | Amino Acid   | Urea Cycle;<br>Arginine/Proline   | 0.80 | 8.44E-01 | 7.01E-01 |           |
| N2,N5-diacetylornithine                   | Amino Acid   | Urea Cycle;<br>Arginine/Proline   | 0.86 | 7.35E-01 | 5.40E-01 |           |
| ornithine                                 | Amino Acid   | Urea Cycle;<br>Arginine/Proline   | 0.93 | 5.44E-01 | 3.02E-01 | HMDB03374 |
| pro-hydroxy-pro                           | Amino Acid   | Urea Cycle;<br>Arginine/Proline   | 1.40 | 4.77E-03 | 2.53E-04 | HMDB06695 |
| proline                                   | Amino Acid   | Urea Cycle;<br>Arginine/Proline   | 1.09 | 1.15E-01 | 1.72E-02 | HMDB00162 |
| trans-4-hydroxyproline                    | Amino Acid   | Urea Cycle;<br>Arginine/Proline   | 1.08 | 2.23E-01 | 4.99E-02 | HMDB00725 |
| urea                                      | Amino Acid   | Urea Cycle;<br>Arginine/Proline   | 1.11 | 3.63E-01 | 1.38E-01 | HMDB00294 |
| N6-carboxymethyllysine                    | Carbohydrate | Advanced Glycation<br>End-Product | 1.20 | 4.66E-01 | 2.29E-01 |           |
| erythronate*                              | Carbohydrate | Aminosugar                        | 1.10 | 2.29E-01 | 5.23E-02 | HMDB00613 |
| glucuronate                               | Carbohydrate | Aminosugar                        | 1.16 | 4.65E-01 | 2.27E-01 | HMDB00127 |
| N-acetylglucosamine/N-acetylgalactosamine | Carbohydrate | Aminosugar                        | 1.06 | 3.26E-01 | 1.00E-01 | HMDB00215 |
| N-acetylglucosaminylasparagine            | Carbohydrate | Aminosugar                        | 1.74 | 2.10E-03 | 8.93E-05 | HMDB00489 |
| N-acetylneuraminate                       | Carbohydrate | Aminosugar                        | 1.47 | 1.14E-05 | 2.83E-07 | HMDB00230 |
| sucrose                                   | Carbohydrate | Disaccharides/Oligosaccharides    | 2.58 | 4.07E-02 | 4.10E-03 | HMDB00258 |

|                              |                        |                                       |       |          |          |           |
|------------------------------|------------------------|---------------------------------------|-------|----------|----------|-----------|
| fructose                     | Carbohydrate           | Fructose/Mannose/Galactose            | 1.06  | 6.41E-01 | 3.97E-01 | HMDB00660 |
| mannitol/sorbitol            | Carbohydrate           | Fructose/Mannose/Galactose            | 0.72  | 9.78E-01 | 9.47E-01 | HMDB00247 |
| mannose                      | Carbohydrate           | Fructose/Mannose/Galactose            | 0.99  | 9.37E-01 | 8.68E-01 | HMDB00169 |
| maltose                      | Carbohydrate           | Glycogen                              | 3.08  | 1.50E-06 | 2.58E-08 | HMDB00163 |
| maltotetraose                | Carbohydrate           | Glycogen                              | 16.02 | 1.14E-05 | 2.58E-07 | HMDB01296 |
| maltotriose                  | Carbohydrate           | Glycogen                              | 10.87 | 7.68E-08 | 6.11E-10 | HMDB01262 |
| 1,5-anhydroglucitol (1,5-AG) | Carbohydrate           | Glycolysis/Gluconeogenesis,,/Pyruvate | 1.01  | 9.85E-01 | 9.62E-01 | HMDB02712 |
| 3-phosphoglycerate           | Carbohydrate           | Glycolysis/Gluconeogenesis,,/Pyruvate | 1.18  | 6.08E-01 | 3.65E-01 | HMDB00807 |
| glucose                      | Carbohydrate           | Glycolysis/Gluconeogenesis,,/Pyruvate | 1.03  | 4.55E-01 | 2.17E-01 | HMDB00122 |
| glycerate                    | Carbohydrate           | Glycolysis/Gluconeogenesis,,/Pyruvate | 0.91  | 5.53E-01 | 3.13E-01 | HMDB00139 |
| lactate                      | Carbohydrate           | Glycolysis/Gluconeogenesis,,/Pyruvate | 1.20  | 1.88E-01 | 3.68E-02 | HMDB00190 |
| pyruvate                     | Carbohydrate           | Glycolysis/Gluconeogenesis,,/Pyruvate | 0.64  | 3.13E-03 | 1.45E-04 | HMDB00243 |
| arabinose                    | Carbohydrate           | Pentose                               | 1.13  | 6.28E-01 | 3.86E-01 | HMDB00646 |
| arabitol/xylitol             | Carbohydrate           | Pentose                               | 0.96  | 8.75E-01 | 7.70E-01 |           |
| arabonate/xylonate           | Carbohydrate           | Pentose                               | 1.00  | 9.58E-01 | 9.17E-01 |           |
| ribitol                      | Carbohydrate           | Pentose                               | 1.01  | 6.41E-01 | 3.96E-01 | HMDB00508 |
| ribonate                     | Carbohydrate           | Pentose                               | 1.06  | 5.55E-01 | 3.17E-01 | HMDB00867 |
| xylose                       | Carbohydrate           | Pentose                               | 1.17  | 8.57E-01 | 7.32E-01 | HMDB00098 |
| gulonate*                    | Cofactors and Vitamins | Ascorbate/Aldarate                    | 1.27  | 2.92E-01 | 7.90E-02 | HMDB03290 |
| oxalate (ethanedioate)       | Cofactors and Vitamins | Ascorbate/Aldarate                    | 0.80  | 2.31E-01 | 5.29E-02 | HMDB02329 |
| threonate                    | Cofactors and Vitamins | Ascorbate/Aldarate                    | 0.67  | 2.23E-02 | 1.82E-03 | HMDB00943 |
| bilirubin (E,E)*             | Cofactors and Vitamins | Hemoglobin/Prophyrin                  | 0.94  | 8.41E-01 | 6.96E-01 |           |
| bilirubin (E,Z or Z,E)*      | Cofactors and Vitamins | Hemoglobin/Prophyrin                  | 0.95  | 9.41E-01 | 8.73E-01 | HMDB00488 |



|                                                 |                        |                         |      |          |          |           |
|-------------------------------------------------|------------------------|-------------------------|------|----------|----------|-----------|
| bilirubin (Z,Z)                                 | Cofactors and Vitamins | Hemoglobin/Porphyrin    | 0.90 | 5.59E-01 | 3.21E-01 | HMDB00054 |
| biliverdin                                      | Cofactors and Vitamins | Hemoglobin/Porphyrin    | 0.96 | 9.39E-01 | 8.71E-01 | HMDB01008 |
| 1-methylnicotinamide                            | Cofactors and Vitamins | Nicotinate/Nicotinamide | 0.91 | 6.41E-01 | 3.99E-01 | HMDB00699 |
| adenosine 5'-diphosphoribose (ADP-ribose)       | Cofactors and Vitamins | Nicotinate/Nicotinamide | 5.19 | 2.70E-05 | 7.52E-07 | HMDB01178 |
| N1-Methyl-2-pyridone-5-carboxamide              | Cofactors and Vitamins | Nicotinate/Nicotinamide | 1.03 | 7.12E-01 | 4.83E-01 | HMDB04193 |
| N1-Methyl-4-pyridone-3-carboxamide              | Cofactors and Vitamins | Nicotinate/Nicotinamide | 1.02 | 7.88E-01 | 6.17E-01 | HMDB04194 |
| nicotinamide                                    | Cofactors and Vitamins | Nicotinate/Nicotinamide | 2.18 | 1.50E-06 | 2.48E-08 | HMDB01406 |
| quinolinate                                     | Cofactors and Vitamins | Nicotinate/Nicotinamide | 1.35 | 2.16E-01 | 4.61E-02 | HMDB00232 |
| trigonelline (N <sup>1</sup> -methylnicotinate) | Cofactors and Vitamins | Nicotinate/Nicotinamide | 0.65 | 1.40E-01 | 2.29E-02 | HMDB00875 |
| pantothenate                                    | Cofactors and Vitamins | Pantothenate/Coa        | 1.05 | 6.86E-01 | 4.49E-01 | HMDB00210 |
| flavin adenine dinucleotide (FAD)               | Cofactors and Vitamins | Riboflavin              | 1.30 | 2.10E-03 | 8.87E-05 | HMDB01248 |
| alpha-CEHC sulfate                              | Cofactors and Vitamins | Tocopherol              | 2.99 | 1.40E-01 | 2.28E-02 |           |
| alpha-tocopherol                                | Cofactors and Vitamins | Tocopherol              | 0.97 | 9.92E-01 | 9.78E-01 | HMDB01893 |
| gamma-CEHC                                      | Cofactors and Vitamins | Tocopherol              | 1.12 | 6.79E-01 | 4.39E-01 | HMDB01931 |
| gamma-CEHC glucuronide*                         | Cofactors and Vitamins | Tocopherol              | 1.43 | 3.68E-01 | 1.42E-01 |           |
| gamma-tocopherol/beta-tocopherol                | Cofactors and Vitamins | Tocopherol              | 0.78 | 8.17E-02 | 1.07E-02 |           |
| beta-cryptoxanthin                              | Cofactors and Vitamins | Vitamin A               | 0.66 | 2.26E-01 | 5.12E-02 | HMDB33844 |
| carotene diol (1)                               | Cofactors and Vitamins | Vitamin A               | 0.93 | 4.66E-01 | 2.29E-01 |           |
| carotene diol (2)                               | Cofactors and Vitamins | Vitamin A               | 0.90 | 3.79E-01 | 1.55E-01 |           |

|                                                     |                        |                           |      |          |          |           |
|-----------------------------------------------------|------------------------|---------------------------|------|----------|----------|-----------|
| carotene diol (3)                                   | Cofactors and Vitamins | Vitamin A                 | 0.80 | 2.85E-01 | 7.49E-02 |           |
| retinol (Vitamin A)                                 | Cofactors and Vitamins | Vitamin A                 | 1.07 | 4.39E-01 | 2.05E-01 | HMDB00305 |
| pyridoxal                                           | Cofactors and Vitamins | Vitamin B6                | 1.06 | 3.25E-01 | 9.91E-02 | HMDB01545 |
| pyridoxate                                          | Cofactors and Vitamins | Vitamin B6                | 1.57 | 3.37E-01 | 1.14E-01 | HMDB00017 |
| phosphate                                           | Energy                 | Oxidative Phosphorylation | 0.92 | 1.56E-01 | 2.82E-02 | HMDB01429 |
| aconitate [cis or trans]                            | Energy                 | TCA Cycle                 | 0.89 | 3.26E-01 | 1.02E-01 |           |
| alpha-ketoglutarate                                 | Energy                 | TCA Cycle                 | 0.86 | 7.35E-01 | 5.36E-01 | HMDB00208 |
| citraconate/glutaconate                             | Energy                 | TCA Cycle                 | 0.58 | 7.06E-02 | 8.33E-03 |           |
| citrate                                             | Energy                 | TCA Cycle                 | 1.00 | 3.84E-01 | 1.61E-01 | HMDB00094 |
| malate                                              | Energy                 | TCA Cycle                 | 0.88 | 4.07E-01 | 1.79E-01 | HMDB00156 |
| succinate                                           | Energy                 | TCA Cycle                 | 0.79 | 8.55E-03 | 5.33E-04 | HMDB00254 |
| succinylcarnitine (C4-DC)                           | Energy                 | TCA Cycle                 | 1.15 | 3.53E-01 | 1.30E-01 | HMDB61717 |
| 11-ketoetiocholanolone glucuronide                  | Lipid                  | Androgenic Steroids       | 2.89 | 8.39E-02 | 1.11E-02 |           |
| 16a-hydroxy DHEA 3-sulfate                          | Lipid                  | Androgenic Steroids       | 1.25 | 7.72E-01 | 5.97E-01 |           |
| 5alpha-androstan-3alpha,17alpha-diol monosulfate    | Lipid                  | Androgenic Steroids       | 1.38 | 7.69E-01 | 5.91E-01 |           |
| 5alpha-androstan-3alpha,17beta-diol disulfate       | Lipid                  | Androgenic Steroids       | 2.07 | 5.94E-01 | 3.52E-01 |           |
| 5alpha-androstan-3alpha,17beta-diol monosulfate (1) | Lipid                  | Androgenic Steroids       | 1.20 | 7.35E-01 | 5.43E-01 |           |
| 5alpha-androstan-3beta,17alpha-diol disulfate       | Lipid                  | Androgenic Steroids       | 1.42 | 8.50E-01 | 7.16E-01 |           |
| 5alpha-androstan-3beta,17beta-diol disulfate        | Lipid                  | Androgenic Steroids       | 1.16 | 9.82E-01 | 9.55E-01 | HMDB00493 |
| 5alpha-androstan-3beta,17beta-diol monosulfate (2)  | Lipid                  | Androgenic Steroids       | 1.19 | 8.57E-01 | 7.37E-01 |           |
| andro steroid monosulfate C19H28O6S (1)*            | Lipid                  | Androgenic Steroids       | 1.28 | 6.87E-01 | 4.52E-01 | HMDB02759 |
| androstenediol (3alpha, 17alpha) monosulfate (2)    | Lipid                  | Androgenic Steroids       | 0.95 | 3.79E-01 | 1.54E-01 |           |
| androstenediol (3alpha, 17alpha) monosulfate (3)    | Lipid                  | Androgenic Steroids       | 1.31 | 8.07E-01 | 6.37E-01 |           |

|                                                                |       |                     |      |          |          |           |
|----------------------------------------------------------------|-------|---------------------|------|----------|----------|-----------|
| androstenediol (3beta,17beta) disulfate (1)                    | Lipid | Androgenic Steroids | 1.19 | 9.91E-01 | 9.71E-01 | HMDB03818 |
| androstenediol (3beta,17beta) disulfate (2)                    | Lipid | Androgenic Steroids | 1.12 | 9.25E-01 | 8.45E-01 | HMDB03818 |
| androstenediol (3beta,17beta) monosulfate (1)                  | Lipid | Androgenic Steroids | 1.18 | 9.78E-01 | 9.47E-01 | HMDB03818 |
| androstenediol (3beta,17beta) monosulfate (2)                  | Lipid | Androgenic Steroids | 1.09 | 8.19E-01 | 6.65E-01 |           |
| androsterone sulfate                                           | Lipid | Androgenic Steroids | 1.27 | 9.10E-01 | 8.22E-01 | HMDB02759 |
| dehydroisoandrosterone sulfate (DHEA-S)                        | Lipid | Androgenic Steroids | 1.13 | 9.51E-01 | 9.02E-01 | HMDB01032 |
| epiandrosterone sulfate                                        | Lipid | Androgenic Steroids | 1.31 | 8.50E-01 | 7.19E-01 |           |
| etiocholanolone glucuronide                                    | Lipid | Androgenic Steroids | 1.76 | 3.79E-01 | 1.53E-01 | HMDB04484 |
| carnitine                                                      | Lipid | Carnitine           | 0.94 | 3.73E-01 | 1.46E-01 | HMDB00062 |
| deoxycarnitine                                                 | Lipid | Carnitine           | 0.98 | 8.46E-01 | 7.04E-01 | HMDB01161 |
| ceramide (d16:1/24:1, d18:1/22:1)*                             | Lipid | Ceramides           | 0.92 | 9.58E-01 | 9.18E-01 |           |
| ceramide (d18:1/14:0, d16:1/16:0)*                             | Lipid | Ceramides           | 0.97 | 8.58E-01 | 7.39E-01 |           |
| ceramide (d18:1/20:0, d16:1/22:0, d20:1/18:0)*                 | Lipid | Ceramides           | 0.77 | 6.78E-01 | 4.34E-01 |           |
| ceramide (d18:2/24:1, d18:1/24:2)*                             | Lipid | Ceramides           | 1.08 | 3.46E-01 | 1.23E-01 |           |
| glycosyl ceramide (d16:1/24:1, d18:1/22:1)*                    | Lipid | Ceramides           | 0.95 | 9.41E-01 | 8.74E-01 |           |
| glycosyl ceramide (d18:1/20:0, d16:1/22:0)*                    | Lipid | Ceramides           | 1.00 | 7.31E-01 | 5.23E-01 |           |
| glycosyl ceramide (d18:1/23:1, d17:1/24:1)*                    | Lipid | Ceramides           | 1.19 | 7.84E-01 | 6.12E-01 |           |
| glycosyl ceramide (d18:2/24:1, d18:1/24:2)*                    | Lipid | Ceramides           | 1.16 | 3.31E-01 | 1.05E-01 |           |
| glycosyl-N-(2-hydroxynervonoyl)-sphingosine (d18:1/24:1(2OH))* | Lipid | Ceramides           | 0.91 | 6.66E-01 | 4.20E-01 |           |
| glycosyl-N-behenoyl-sphingadienine (d18:2/22:0)*               | Lipid | Ceramides           | 1.03 | 8.59E-01 | 7.44E-01 |           |
| glycosyl-N-palmitoyl-sphingosine (d18:1/16:0)                  | Lipid | Ceramides           | 1.07 | 3.40E-01 | 1.17E-01 |           |

|                                                  |       |                           |      |          |          |           |
|--------------------------------------------------|-------|---------------------------|------|----------|----------|-----------|
| glycosyl-N-stearoyl-sphingosine (d18:1/18:0)     | Lipid | Ceramides                 | 1.10 | 3.26E-01 | 1.02E-01 |           |
| lactosyl-N-nervonoyl-sphingosine (d18:1/24:1)*   | Lipid | Ceramides                 | 1.06 | 3.09E-01 | 8.98E-02 |           |
| lactosyl-N-palmitoyl-sphingosine (d18:1/16:0)    | Lipid | Ceramides                 | 1.04 | 2.96E-01 | 8.14E-02 |           |
| N-palmitoyl-sphingosine (d18:1/16:0)             | Lipid | Ceramides                 | 1.14 | 2.21E-02 | 1.76E-03 | HMDB04949 |
| N-stearoyl-sphingosine (d18:1/18:0)*             | Lipid | Ceramides                 | 1.17 | 7.26E-02 | 9.05E-03 | HMDB04950 |
| corticosterone                                   | Lipid | Corticosteroids           | 1.19 | 6.79E-01 | 4.37E-01 | HMDB01547 |
| cortisol                                         | Lipid | Corticosteroids           | 1.06 | 4.81E-01 | 2.40E-01 | HMDB00063 |
| cortisone                                        | Lipid | Corticosteroids           | 0.97 | 8.47E-01 | 7.06E-01 | HMDB02802 |
| linoleoyl-arachidonoyl-glycerol (18:2/20:4) [1]* | Lipid | Diacylglycerol            | 1.12 | 6.78E-01 | 4.34E-01 | HMDB07257 |
| linoleoyl-arachidonoyl-glycerol (18:2/20:4) [2]* | Lipid | Diacylglycerol            | 1.19 | 4.43E-01 | 2.09E-01 | HMDB07257 |
| linoleoyl-linoleoyl-glycerol (18:2/18:2) [1]*    | Lipid | Diacylglycerol            | 1.10 | 7.43E-01 | 5.54E-01 | HMDB07248 |
| oleoyl-arachidonoyl-glycerol (18:1/20:4) [2]*    | Lipid | Diacylglycerol            | 1.30 | 4.55E-01 | 2.17E-01 | HMDB07228 |
| oleoyl-linoleoyl-glycerol (18:1/18:2) [1]        | Lipid | Diacylglycerol            | 1.16 | 4.71E-01 | 2.35E-01 | HMDB07219 |
| oleoyl-linoleoyl-glycerol (18:1/18:2) [2]        | Lipid | Diacylglycerol            | 1.24 | 3.31E-01 | 1.11E-01 | HMDB07219 |
| oleoyl-oleoyl-glycerol (18:1/18:1) [2]*          | Lipid | Diacylglycerol            | 1.51 | 3.41E-01 | 1.18E-01 | HMDB07218 |
| palmitoleoyl-linoleoyl-glycerol (16:1/18:2) [1]* | Lipid | Diacylglycerol            | 1.24 | 3.46E-01 | 1.24E-01 | HMDB07132 |
| linoleoyl ethanolamide                           | Lipid | Endocannabinoid           | 0.85 | 5.33E-01 | 2.94E-01 | HMDB12252 |
| N-oleoylserine                                   | Lipid | Endocannabinoid           | 0.86 | 3.75E-01 | 1.48E-01 |           |
| N-oleoyltaurine                                  | Lipid | Endocannabinoid           | 0.90 | 8.83E-01 | 7.80E-01 |           |
| N-palmitoylserine                                | Lipid | Endocannabinoid           | 1.06 | 4.84E-01 | 2.43E-01 |           |
| N-palmitoyltaurine                               | Lipid | Endocannabinoid           | 1.22 | 2.20E-01 | 4.81E-02 |           |
| N-stearoyltaurine                                | Lipid | Endocannabinoid           | 0.98 | 8.19E-01 | 6.63E-01 |           |
| oleoyl ethanolamide                              | Lipid | Endocannabinoid           | 0.86 | 5.45E-01 | 3.04E-01 | HMDB02088 |
| arachidonoylcholine                              | Lipid | Fatty Acid (Acyl Choline) | 1.09 | 7.19E-01 | 5.02E-01 |           |

|                               |       |                             |      |          |          |           |
|-------------------------------|-------|-----------------------------|------|----------|----------|-----------|
| dihomo-linolenoyl-choline     | Lipid | Fatty Acid (Acyl Choline)   | 1.34 | 3.82E-01 | 1.58E-01 |           |
| docosahexaenoylcholine        | Lipid | Fatty Acid (Acyl Choline)   | 0.97 | 9.28E-01 | 8.58E-01 |           |
| eicosapentaenoylcholine       | Lipid | Fatty Acid (Acyl Choline)   | 0.88 | 8.81E-01 | 7.77E-01 |           |
| linoleoylcholine*             | Lipid | Fatty Acid (Acyl Choline)   | 1.20 | 5.66E-01 | 3.28E-01 |           |
| oleoylcholine                 | Lipid | Fatty Acid (Acyl Choline)   | 1.36 | 3.26E-01 | 1.02E-01 |           |
| palmitoylcholine              | Lipid | Fatty Acid (Acyl Choline)   | 1.20 | 4.58E-01 | 2.20E-01 |           |
| stearoylcholine*              | Lipid | Fatty Acid (Acyl Choline)   | 1.26 | 4.66E-01 | 2.29E-01 |           |
| hexanoylglutamine             | Lipid | Fatty Acid (Acyl Glutamine) | 1.06 | 7.43E-01 | 5.59E-01 |           |
| butyrylcarnitine (C4)         | Lipid | Fatty Acid (Also Bcaa )     | 0.92 | 6.18E-01 | 3.78E-01 | HMDB02013 |
| methylmalonate (MMA)          | Lipid | Fatty Acid (Also Bcaa )     | 1.10 | 6.51E-01 | 4.06E-01 | HMDB00202 |
| propionylcarnitine (C3)       | Lipid | Fatty Acid (Also Bcaa )     | 1.06 | 5.94E-01 | 3.52E-01 | HMDB00824 |
| propionylglycine              | Lipid | Fatty Acid (Also Bcaa )     | 0.93 | 9.28E-01 | 8.52E-01 | HMDB00783 |
| 3-hydroxybutyrylcarnitine (1) | Lipid | Fatty Acid (Acyl Carnitine) | 0.82 | 9.28E-01 | 8.54E-01 | HMDB13127 |
| 3-hydroxybutyrylcarnitine (2) | Lipid | Fatty Acid (Acyl Carnitine) | 1.09 | 6.93E-01 | 4.63E-01 | HMDB13127 |
| acetylcarnitine (C2)          | Lipid | Fatty Acid (Acyl Carnitine) | 0.87 | 5.12E-01 | 2.69E-01 | HMDB00201 |
| adipoylcarnitine (C6-DC)      | Lipid | Fatty Acid (Acyl Carnitine) | 1.39 | 1.16E-01 | 1.77E-02 | HMDB61677 |
| arachidonoylcarnitine (C20:4) | Lipid | Fatty Acid (Acyl Carnitine) | 0.77 | 3.11E-01 | 9.23E-02 |           |
| arachidoylcarnitine (C20)*    | Lipid | Fatty Acid (Acyl Carnitine) | 0.97 | 9.58E-01 | 9.16E-01 | HMDB06460 |
| cerotoylcarnitine (C26)*      | Lipid | Fatty Acid (Acyl Carnitine) | 0.93 | 7.37E-01 | 5.46E-01 | HMDB06347 |

|                                                    |       |                             |      |          |          |           |
|----------------------------------------------------|-------|-----------------------------|------|----------|----------|-----------|
| cis-4-decenoylcarnitine (C10:1)                    | Lipid | Fatty Acid (Acyl Carnitine) | 1.04 | 9.87E-01 | 9.66E-01 |           |
| decanoylcarnitine (C10)                            | Lipid | Fatty Acid (Acyl Carnitine) | 1.30 | 6.91E-01 | 4.58E-01 | HMDB00651 |
| dihomo-linolenoylcarnitine (20:3n3 or 6)*          | Lipid | Fatty Acid (Acyl Carnitine) | 0.79 | 3.50E-01 | 1.27E-01 |           |
| dihomo-linoleoylcarnitine (C20:2)*                 | Lipid | Fatty Acid (Acyl Carnitine) | 0.82 | 3.79E-01 | 1.54E-01 |           |
| eicosenoylcarnitine (C20:1)*                       | Lipid | Fatty Acid (Acyl Carnitine) | 0.88 | 4.66E-01 | 2.30E-01 |           |
| hexanoylcarnitine (C6)                             | Lipid | Fatty Acid (Acyl Carnitine) | 1.12 | 8.14E-01 | 6.44E-01 | HMDB00705 |
| laurylcarnitine (C12)                              | Lipid | Fatty Acid (Acyl Carnitine) | 1.19 | 7.13E-01 | 4.87E-01 | HMDB02250 |
| lignoceroylcarnitine (C24)*                        | Lipid | Fatty Acid (Acyl Carnitine) | 0.84 | 1.98E-01 | 4.03E-02 |           |
| linolenoylcarnitine (C18:3)*                       | Lipid | Fatty Acid (Acyl Carnitine) | 0.73 | 1.15E-01 | 1.74E-02 |           |
| linoleoylcarnitine (C18:2)*                        | Lipid | Fatty Acid (Acyl Carnitine) | 0.77 | 7.86E-02 | 1.02E-02 | HMDB06469 |
| margaroylcarnitine*                                | Lipid | Fatty Acid (Acyl Carnitine) | 0.84 | 3.63E-01 | 1.38E-01 | HMDB06210 |
| myristoleoylcarnitine (C14:1)*                     | Lipid | Fatty Acid (Acyl Carnitine) | 1.15 | 6.86E-01 | 4.48E-01 |           |
| myristoylcarnitine (C14)                           | Lipid | Fatty Acid (Acyl Carnitine) | 1.03 | 9.25E-01 | 8.45E-01 | HMDB05066 |
| nervonoylcarnitine (C24:1)*                        | Lipid | Fatty Acid (Acyl Carnitine) | 0.83 | 4.67E-01 | 2.31E-01 |           |
| octanoylcarnitine (C8)                             | Lipid | Fatty Acid (Acyl Carnitine) | 1.23 | 7.19E-01 | 5.02E-01 | HMDB00791 |
| oleoylcarnitine (C18:1)                            | Lipid | Fatty Acid (Acyl Carnitine) | 0.82 | 2.25E-01 | 5.07E-02 | HMDB05065 |
| palmitoleoylcarnitine (C16:1)*                     | Lipid | Fatty Acid (Acyl Carnitine) | 0.99 | 9.92E-01 | 9.74E-01 |           |
| palmitoylcarnitine (C16)                           | Lipid | Fatty Acid (Acyl Carnitine) | 0.91 | 4.85E-01 | 2.47E-01 | HMDB00222 |
| pimeloylcarnitine/3-methyladipoylcarnitine (C7-DC) | Lipid | Fatty Acid (Acyl Carnitine) | 1.05 | 6.08E-01 | 3.66E-01 |           |

|                                                      |       |                             |      |          |          |           |
|------------------------------------------------------|-------|-----------------------------|------|----------|----------|-----------|
| stearoylcarnitine (C18)                              | Lipid | Fatty Acid (Acyl Carnitine) | 0.90 | 5.17E-01 | 2.80E-01 | HMDB00848 |
| suberoylcarnitine (C8-DC)                            | Lipid | Fatty Acid (Acyl Carnitine) | 1.37 | 3.31E-01 | 1.08E-01 |           |
| ximenoylcarnitine (C26:1)*                           | Lipid | Fatty Acid (Acyl Carnitine) | 0.96 | 8.83E-01 | 7.82E-01 |           |
| hexanoylglycine                                      | Lipid | Fatty Acid (Acyl Glycine)   | 0.76 | 7.23E-01 | 5.07E-01 | HMDB00701 |
| N-palmitoylglycine                                   | Lipid | Fatty Acid (Acyl Glycine)   | 0.94 | 8.50E-01 | 7.17E-01 | HMDB13034 |
| malonate                                             | Lipid | Fatty Acid Synthesis        | 0.70 | 2.01E-01 | 4.25E-02 | HMDB00691 |
| linoleamide (18:2n6)                                 | Lipid | Fatty Acid/Amide            | 0.80 | 7.26E-02 | 8.80E-03 |           |
| oleamide                                             | Lipid | Fatty Acid/Amide            | 0.78 | 2.31E-02 | 1.96E-03 | HMDB02117 |
| palmitic amide                                       | Lipid | Fatty Acid/Amide            | 0.77 | 2.25E-02 | 1.88E-03 | HMDB12273 |
| stearamide                                           | Lipid | Fatty Acid/Amide            | 0.72 | 3.41E-03 | 1.76E-04 | HMDB34146 |
| 2-aminoheptanoate                                    | Lipid | Fatty Acid/Amino            | 1.11 | 3.75E-01 | 1.49E-01 |           |
| 2-aminooctanoate                                     | Lipid | Fatty Acid/Amino            | 0.82 | 3.46E-01 | 1.24E-01 | HMDB00991 |
| 13-methylmyristate (i15:0)                           | Lipid | Fatty Acid/Branched         | 0.72 | 4.55E-02 | 4.83E-03 |           |
| 15-methylpalmitate (i17:0)                           | Lipid | Fatty Acid/Branched         | 0.76 | 1.28E-01 | 2.04E-02 |           |
| 17-methylstearate (i19:0)                            | Lipid | Fatty Acid/Branched         | 0.82 | 2.93E-01 | 7.97E-02 | HMDB37397 |
| pristanate                                           | Lipid | Fatty Acid/Branched         | 0.63 | 8.63E-04 | 3.09E-05 | HMDB00795 |
| 2-hydroxyglutarate                                   | Lipid | Fatty Acid/Dicarboxylate    | 0.96 | 8.57E-01 | 7.35E-01 | HMDB00606 |
| 3-carboxy-4-methyl-5-propyl-2-furanpropanoate (CMPF) | Lipid | Fatty Acid/Dicarboxylate    | 0.83 | 6.87E-01 | 4.52E-01 | HMDB61112 |
| adipate                                              | Lipid | Fatty Acid/Dicarboxylate    | 0.95 | 9.28E-01 | 8.54E-01 | HMDB00448 |
| azelate (nonanedioate)                               | Lipid | Fatty Acid/Dicarboxylate    | 1.24 | 7.26E-02 | 8.84E-03 | HMDB00784 |
| docosadioate                                         | Lipid | Fatty Acid/Dicarboxylate    | 0.85 | 6.04E-01 | 3.61E-01 |           |
| dodecanedioate                                       | Lipid | Fatty Acid/Dicarboxylate    | 1.30 | 2.58E-01 | 6.33E-02 | HMDB00623 |
| eicosanodioate                                       | Lipid | Fatty Acid/Dicarboxylate    | 0.79 | 1.73E-01 | 3.23E-02 |           |
| glutarate (pentanedioate)                            | Lipid | Fatty Acid/Dicarboxylate    | 1.05 | 9.44E-01 | 8.83E-01 | HMDB00661 |

|                         |       |                          |      |          |          |           |
|-------------------------|-------|--------------------------|------|----------|----------|-----------|
| hexadecanedioate        | Lipid | Fatty Acid/Dicarboxylate | 1.02 | 7.43E-01 | 5.55E-01 | HMDB00672 |
| maleate                 | Lipid | Fatty Acid/Dicarboxylate | 0.55 | 1.14E-05 | 2.88E-07 | HMDB00176 |
| octadecanedioate        | Lipid | Fatty Acid/Dicarboxylate | 0.95 | 9.10E-01 | 8.23E-01 | HMDB00782 |
| sebacate (decanedioate) | Lipid | Fatty Acid/Dicarboxylate | 0.96 | 9.82E-01 | 9.53E-01 | HMDB00792 |
| suberate (octanedioate) | Lipid | Fatty Acid/Dicarboxylate | 1.16 | 3.57E-01 | 1.33E-01 | HMDB00893 |
| tetradecanedioate       | Lipid | Fatty Acid/Dicarboxylate | 1.05 | 7.10E-01 | 4.80E-01 | HMDB00872 |
| undecanedioate          | Lipid | Fatty Acid/Dicarboxylate | 1.18 | 1.88E-01 | 3.66E-02 | HMDB00888 |
| 12,13-DiHOME            | Lipid | Fatty Acid/Dihydroxy     | 0.98 | 3.46E-01 | 1.23E-01 | HMDB04705 |
| 9,10-DiHOME             | Lipid | Fatty Acid/Dihydroxy     | 0.92 | 6.15E-01 | 3.75E-01 | HMDB04704 |
| 13-HODE + 9-HODE        | Lipid | Fatty Acid/Monohydroxy   | 0.79 | 3.52E-02 | 3.51E-03 |           |
| 16-hydroxypalmitate     | Lipid | Fatty Acid/Monohydroxy   | 0.86 | 3.40E-01 | 1.16E-01 | HMDB06294 |
| 2-hydroxydecanoate      | Lipid | Fatty Acid/Monohydroxy   | 0.84 | 2.36E-01 | 5.51E-02 |           |
| 2-hydroxylaurate        | Lipid | Fatty Acid/Monohydroxy   | 0.93 | 5.74E-01 | 3.35E-01 |           |
| 2-hydroxynervonate*     | Lipid | Fatty Acid/Monohydroxy   | 0.92 | 8.48E-01 | 7.07E-01 |           |
| 2-hydroxyoctanoate      | Lipid | Fatty Acid/Monohydroxy   | 0.92 | 4.36E-01 | 2.00E-01 | HMDB02264 |
| 2-hydroxypalmitate      | Lipid | Fatty Acid/Monohydroxy   | 0.88 | 2.21E-01 | 4.89E-02 | HMDB31057 |
| 2-hydroxystearate       | Lipid | Fatty Acid/Monohydroxy   | 0.83 | 3.14E-02 | 2.83E-03 |           |
| 3-hydroxydecanoate      | Lipid | Fatty Acid/Monohydroxy   | 0.94 | 8.59E-01 | 7.44E-01 | HMDB02203 |
| 3-hydroxyhexanoate      | Lipid | Fatty Acid/Monohydroxy   | 0.95 | 6.91E-01 | 4.60E-01 |           |
| 3-hydroxylaurate        | Lipid | Fatty Acid/Monohydroxy   | 0.75 | 1.18E-01 | 1.81E-02 | HMDB00387 |



|                              |       |                              |      |          |          |           |
|------------------------------|-------|------------------------------|------|----------|----------|-----------|
| 3-hydroxyoctanoate           | Lipid | Fatty Acid/Monohydroxy Fatty | 1.07 | 8.50E-01 | 7.18E-01 | HMDB01954 |
| 3-hydroxysebacate            | Lipid | Fatty Acid/Monohydroxy Fatty | 1.29 | 3.75E-01 | 1.48E-01 | HMDB00350 |
| 5-hydroxyhexanoate           | Lipid | Fatty Acid/Monohydroxy Fatty | 1.30 | 5.60E-01 | 3.23E-01 | HMDB00525 |
| 9-hydroxystearate            | Lipid | Fatty Acid/Monohydroxy       | 0.78 | 3.26E-01 | 1.03E-01 | HMDB61661 |
| glycerol                     | Lipid | Glycerolipid                 | 0.91 | 6.78E-01 | 4.35E-01 | HMDB00131 |
| glycerol 3-phosphate         | Lipid | Glycerolipid                 | 0.66 | 7.69E-07 | 1.02E-08 | HMDB00126 |
| glycerophosphoglycerol       | Lipid | Glycerolipid                 | 1.20 | 5.57E-01 | 3.19E-01 |           |
| chiro-inositol               | Lipid | Inositol                     | 1.16 | 9.60E-01 | 9.22E-01 | HMDB34220 |
| myo-inositol                 | Lipid | Inositol                     | 0.87 | 7.31E-01 | 5.23E-01 | HMDB00211 |
| 3-hydroxybutyrate (BHBA)     | Lipid | Ketone Bodies                | 0.71 | 5.73E-01 | 3.32E-01 | HMDB00357 |
| acetoacetate                 | Lipid | Ketone Bodies                | 0.75 | 6.76E-01 | 4.30E-01 | HMDB00060 |
| 10-heptadecenoate (17:1n7)   | Lipid | Long Chain Fatty Acid        | 0.77 | 3.03E-01 | 8.50E-02 | HMDB60038 |
| 10-nonadecenoate (19:1n9)    | Lipid | Long Chain Fatty Acid        | 0.78 | 2.91E-01 | 7.80E-02 | HMDB13622 |
| arachidate (20:0)            | Lipid | Long Chain Fatty Acid        | 0.92 | 4.85E-01 | 2.48E-01 | HMDB02212 |
| eicosenoate (20:1)           | Lipid | Long Chain Fatty Acid        | 0.78 | 3.57E-01 | 1.32E-01 | HMDB02231 |
| erucate (22:1n9)             | Lipid | Long Chain Fatty Acid        | 1.00 | 8.55E-01 | 7.28E-01 | HMDB02068 |
| margarate (17:0)             | Lipid | Long Chain Fatty Acid        | 0.79 | 1.79E-01 | 3.40E-02 | HMDB02259 |
| myristate (14:0)             | Lipid | Long Chain Fatty Acid        | 0.75 | 1.12E-01 | 1.56E-02 | HMDB00806 |
| myristoleate (14:1n5)        | Lipid | Long Chain Fatty Acid        | 0.79 | 4.23E-01 | 1.91E-01 | HMDB02000 |
| nonadecanoate (19:0)         | Lipid | Long Chain Fatty Acid        | 0.84 | 2.65E-01 | 6.67E-02 | HMDB00772 |
| oleate/vaccenate (18:1)      | Lipid | Long Chain Fatty Acid        | 0.79 | 2.47E-01 | 5.89E-02 |           |
| palmitate (16:0)             | Lipid | Long Chain Fatty Acid        | 0.79 | 1.24E-01 | 1.95E-02 | HMDB00220 |
| palmitoleate (16:1n7)        | Lipid | Long Chain Fatty Acid        | 0.76 | 3.94E-01 | 1.69E-01 | HMDB03229 |
| pentadecanoate (15:0)        | Lipid | Long Chain Fatty Acid        | 0.79 | 7.64E-02 | 9.83E-03 | HMDB00826 |
| stearate (18:0)              | Lipid | Long Chain Fatty Acid        | 0.84 | 1.77E-01 | 3.33E-02 | HMDB00827 |
| 1-arachidonoyl-GPA (20:4)    | Lipid | Lysophospholipid             | 0.86 | 8.34E-01 | 6.87E-01 |           |
| 1-arachidonoyl-GPC (20:4n6)* | Lipid | Lysophospholipid             | 0.94 | 8.19E-01 | 6.60E-01 | HMDB10395 |
| 1-arachidonoyl-GPE (20:4n6)* | Lipid | Lysophospholipid             | 1.05 | 3.46E-01 | 1.24E-01 | HMDB11517 |
| 1-arachidonoyl-GPI (20:4)*   | Lipid | Lysophospholipid             | 0.89 | 5.18E-01 | 2.81E-01 | HMDB61690 |
| 1-lignoceroyl-GPC (24:0)     | Lipid | Lysophospholipid             | 0.97 | 9.10E-01 | 8.23E-01 | HMDB10405 |
| 1-linolenoyl-GPC (18:3)*     | Lipid | Lysophospholipid             | 1.03 | 9.98E-01 | 9.92E-01 | HMDB10388 |
| 1-linoleoyl-GPA (18:2)*      | Lipid | Lysophospholipid             | 0.70 | 3.31E-02 | 3.12E-03 | HMDB07856 |

|                                    |       |                         |      |          |          |           |
|------------------------------------|-------|-------------------------|------|----------|----------|-----------|
| 1-linoleoyl-GPC (18:2)             | Lipid | Lysophospholipid        | 0.99 | 8.19E-01 | 6.56E-01 | HMDB10386 |
| 1-linoleoyl-GPE (18:2)*            | Lipid | Lysophospholipid        | 1.13 | 4.55E-01 | 2.18E-01 | HMDB11507 |
| 1-linoleoyl-GPG (18:2)*            | Lipid | Lysophospholipid        | 0.99 | 8.17E-01 | 6.51E-01 |           |
| 1-linoleoyl-GPI (18:2)*            | Lipid | Lysophospholipid        | 0.93 | 6.59E-01 | 4.12E-01 |           |
| 1-oleoyl-GPC (18:1)                | Lipid | Lysophospholipid        | 1.01 | 7.69E-01 | 5.91E-01 | HMDB02815 |
| 1-oleoyl-GPE (18:1)                | Lipid | Lysophospholipid        | 1.08 | 6.28E-01 | 3.86E-01 | HMDB11506 |
| 1-oleoyl-GPG (18:1)*               | Lipid | Lysophospholipid        | 1.30 | 3.31E-01 | 1.10E-01 |           |
| 1-oleoyl-GPI (18:1)*               | Lipid | Lysophospholipid        | 0.92 | 8.20E-01 | 6.71E-01 |           |
| 1-palmitoleoyl-GPC (16:1)*         | Lipid | Lysophospholipid        | 0.99 | 9.58E-01 | 9.16E-01 | HMDB10383 |
| 1-palmitoyl-GPA (16:0)             | Lipid | Lysophospholipid        | 0.90 | 7.87E-01 | 6.15E-01 | HMDB00327 |
| 1-palmitoyl-GPC (16:0)             | Lipid | Lysophospholipid        | 0.94 | 4.60E-01 | 2.22E-01 | HMDB10382 |
| 1-palmitoyl-GPE (16:0)             | Lipid | Lysophospholipid        | 1.04 | 7.31E-01 | 5.27E-01 | HMDB11503 |
| 1-palmitoyl-GPG (16:0)*            | Lipid | Lysophospholipid        | 1.03 | 7.64E-01 | 5.85E-01 |           |
| 1-palmitoyl-GPI (16:0)             | Lipid | Lysophospholipid        | 1.06 | 7.19E-01 | 5.00E-01 | HMDB61695 |
| 1-stearoyl-GPC (18:0)              | Lipid | Lysophospholipid        | 0.96 | 7.15E-01 | 4.90E-01 | HMDB10384 |
| 1-stearoyl-GPE (18:0)              | Lipid | Lysophospholipid        | 1.09 | 3.31E-01 | 1.10E-01 | HMDB11130 |
| 1-stearoyl-GPG (18:0)              | Lipid | Lysophospholipid        | 0.97 | 9.98E-01 | 9.95E-01 |           |
| 1-stearoyl-GPI (18:0)              | Lipid | Lysophospholipid        | 0.93 | 8.57E-01 | 7.35E-01 | HMDB61696 |
| 2-palmitoleoyl-GPC (16:1)*         | Lipid | Lysophospholipid        | 1.00 | 9.44E-01 | 8.82E-01 | HMDB10383 |
| 2-palmitoyl-GPC (16:0)*            | Lipid | Lysophospholipid        | 0.89 | 2.73E-01 | 7.00E-02 | HMDB61702 |
| 2-stearoyl-GPE (18:0)*             | Lipid | Lysophospholipid        | 0.96 | 8.83E-01 | 7.82E-01 | HMDB11129 |
| 1-(1-enyl-oleoyl)-GPE (P-18:1)*    | Lipid | Lysoplasmalogen         | 1.20 | 7.46E-02 | 9.42E-03 |           |
| 1-(1-enyl-palmitoyl)-GPC (P-16:0)* | Lipid | Lysoplasmalogen         | 0.91 | 4.58E-01 | 2.20E-01 | HMDB10407 |
| 1-(1-enyl-palmitoyl)-GPE (P-16:0)* | Lipid | Lysoplasmalogen         | 1.25 | 5.77E-03 | 3.21E-04 |           |
| 1-(1-enyl-stearoyl)-GPE (P-18:0)*  | Lipid | Lysoplasmalogen         | 1.23 | 3.15E-02 | 2.88E-03 |           |
| 10-undecenoate (11:1n1)            | Lipid | Medium Chain Fatty Acid | 0.63 | 6.67E-06 | 1.42E-07 | HMDB33724 |
| 5-dodecenoate (12:1n7)             | Lipid | Medium Chain Fatty Acid | 0.93 | 8.20E-01 | 6.69E-01 | HMDB00529 |
| caprate (10:0)                     | Lipid | Medium Chain Fatty Acid | 0.84 | 4.36E-01 | 2.00E-01 | HMDB00511 |
| caproate (6:0)                     | Lipid | Medium Chain Fatty Acid | 1.34 | 1.15E-01 | 1.68E-02 | HMDB00535 |
| caprylate (8:0)                    | Lipid | Medium Chain Fatty Acid | 1.20 | 6.77E-01 | 4.32E-01 | HMDB00482 |

|                                                         |       |                          |      |          |          |           |
|---------------------------------------------------------|-------|--------------------------|------|----------|----------|-----------|
| heptanoate (7:0)                                        | Lipid | Medium Chain Fatty Acid  | 1.86 | 1.85E-06 | 3.43E-08 | HMDB00666 |
| laurate (12:0)                                          | Lipid | Medium Chain Fatty Acid  | 0.88 | 7.79E-01 | 6.04E-01 | HMDB00638 |
| 3-hydroxy-3-methylglutarate                             | Lipid | Mevalonate               | 1.02 | 5.17E-01 | 2.77E-01 | HMDB00355 |
| 1-arachidonylglycerol (20:4)                            | Lipid | Monoacylglycerol         | 0.85 | 7.15E-01 | 4.89E-01 | HMDB11549 |
| 1-dihomo-linolenylglycerol (20:3)                       | Lipid | Monoacylglycerol         | 0.80 | 3.88E-01 | 1.65E-01 |           |
| 1-linolenylglycerol (18:3)                              | Lipid | Monoacylglycerol         | 0.59 | 1.33E-02 | 9.19E-04 | HMDB11569 |
| 1-linoleoylglycerol (18:2)                              | Lipid | Monoacylglycerol         | 0.59 | 4.87E-04 | 1.68E-05 |           |
| 1-myristoylglycerol (14:0)                              | Lipid | Monoacylglycerol         | 0.79 | 3.55E-01 | 1.31E-01 | HMDB11561 |
| 1-oleoylglycerol (18:1)                                 | Lipid | Monoacylglycerol         | 0.68 | 3.42E-02 | 3.30E-03 | HMDB11567 |
| 1-palmitoleoylglycerol (16:1)*                          | Lipid | Monoacylglycerol         | 0.46 | 1.65E-03 | 6.35E-05 | HMDB11565 |
| 1-palmitoylglycerol (16:0)                              | Lipid | Monoacylglycerol         | 0.72 | 1.56E-01 | 2.79E-02 | HMDB31074 |
| 2-arachidonoylglycerol (20:4)                           | Lipid | Monoacylglycerol         | 1.20 | 5.31E-01 | 2.91E-01 | HMDB04666 |
| 2-linoleoylglycerol (18:2)                              | Lipid | Monoacylglycerol         | 0.60 | 1.57E-01 | 2.87E-02 | HMDB11538 |
| 2-oleoylglycerol (18:1)                                 | Lipid | Monoacylglycerol         | 0.67 | 3.04E-01 | 8.74E-02 | HMDB11537 |
| 2-palmitoylglycerol (16:0)                              | Lipid | Monoacylglycerol         | 1.51 | 4.71E-01 | 2.34E-01 | HMDB11533 |
| 1,2-dilinoleoyl-GPC (18:2/18:2)                         | Lipid | Phosphatidylcholine (Pc) | 0.98 | 8.19E-01 | 6.65E-01 | HMDB08138 |
| 1,2-dipalmitoyl-GPC (16:0/16:0)                         | Lipid | Phosphatidylcholine (Pc) | 1.04 | 3.03E-01 | 8.62E-02 | HMDB00564 |
| 1-linoleoyl-2-arachidonoyl-GPC (18:2/20:4n6)*           | Lipid | Phosphatidylcholine (Pc) | 0.88 | 1.44E-01 | 2.46E-02 | HMDB08147 |
| 1-linoleoyl-2-linolenoyl-GPC (18:2/18:3)*               | Lipid | Phosphatidylcholine (Pc) | 1.07 | 8.55E-01 | 7.24E-01 | HMDB08141 |
| 1-myristoyl-2-arachidonoyl-GPC (14:0/20:4)*             | Lipid | Phosphatidylcholine (Pc) | 0.91 | 6.83E-01 | 4.43E-01 | HMDB07883 |
| 1-myristoyl-2-palmitoyl-GPC (14:0/16:0)                 | Lipid | Phosphatidylcholine (Pc) | 1.06 | 7.42E-01 | 5.51E-01 | HMDB07869 |
| 1-oleoyl-2-docosaheptaenoyl-GPC (18:1/22:6)*            | Lipid | Phosphatidylcholine (Pc) | 0.98 | 9.98E-01 | 9.94E-01 | HMDB08123 |
| 1-palmitoleoyl-2-linolenoyl-GPC (16:1/18:3)*            | Lipid | Phosphatidylcholine (Pc) | 1.07 | 7.62E-01 | 5.79E-01 | HMDB08008 |
| 1-palmitoyl-2-arachidonoyl-GPC (16:0/20:4n6)            | Lipid | Phosphatidylcholine (Pc) | 0.93 | 4.96E-01 | 2.56E-01 | HMDB07982 |
| 1-palmitoyl-2-dihomo-linolenoyl-GPC (16:0/20:3n3 or 6)* | Lipid | Phosphatidylcholine (Pc) | 1.02 | 2.52E-01 | 6.08E-02 |           |

|                                                   |       |                               |      |          |          |           |
|---------------------------------------------------|-------|-------------------------------|------|----------|----------|-----------|
| 1-palmitoyl-2-docosahexaenoyl-GPC (16:0/22:6)     | Lipid | Phosphatidylcholine (Pc)      | 0.94 | 6.38E-01 | 3.93E-01 | HMDB07991 |
| 1-palmitoyl-2-gamma-linolenoyl-GPC (16:0/18:3n6)* | Lipid | Phosphatidylcholine (Pc)      | 1.07 | 6.86E-01 | 4.49E-01 | HMDB07974 |
| 1-palmitoyl-2-linoleoyl-GPC (16:0/18:2)           | Lipid | Phosphatidylcholine (Pc)      | 0.99 | 9.98E-01 | 9.89E-01 | HMDB07973 |
| 1-palmitoyl-2-oleoyl-GPC (16:0/18:1)              | Lipid | Phosphatidylcholine (Pc)      | 1.03 | 1.73E-01 | 3.22E-02 | HMDB07972 |
| 1-palmitoyl-2-palmitoleoyl-GPC (16:0/16:1)*       | Lipid | Phosphatidylcholine (Pc)      | 1.12 | 3.88E-01 | 1.66E-01 | HMDB07969 |
| 1-palmitoyl-2-stearoyl-GPC (16:0/18:0)            | Lipid | Phosphatidylcholine (Pc)      | 1.10 | 7.46E-02 | 9.50E-03 | HMDB07970 |
| 1-stearoyl-2-arachidonoyl-GPC (18:0/20:4)         | Lipid | Phosphatidylcholine (Pc)      | 0.93 | 5.48E-01 | 3.06E-01 | HMDB08048 |
| 1-stearoyl-2-docosahexaenoyl-GPC (18:0/22:6)      | Lipid | Phosphatidylcholine (Pc)      | 0.96 | 7.88E-01 | 6.19E-01 | HMDB08057 |
| 1-stearoyl-2-linoleoyl-GPC (18:0/18:2)*           | Lipid | Phosphatidylcholine (Pc)      | 0.98 | 8.19E-01 | 6.64E-01 | HMDB08039 |
| 1-stearoyl-2-oleoyl-GPC (18:0/18:1)               | Lipid | Phosphatidylcholine (Pc)      | 1.06 | 3.31E-01 | 1.09E-01 | HMDB08038 |
| 1,2-dilinoleoyl-GPE (18:2/18:2)*                  | Lipid | Phosphatidylethanolamine (Pe) | 1.44 | 5.49E-01 | 3.09E-01 | HMDB09093 |
| 1-linoleoyl-2-arachidonoyl-GPE (18:2/20:4)*       | Lipid | Phosphatidylethanolamine (Pe) | 1.16 | 3.63E-01 | 1.38E-01 | HMDB09102 |
| 1-oleoyl-2-arachidonoyl-GPE (18:1/20:4)*          | Lipid | Phosphatidylethanolamine (Pe) | 1.35 | 1.55E-02 | 1.13E-03 | HMDB09069 |
| 1-oleoyl-2-docosahexaenoyl-GPE (18:1/22:6)*       | Lipid | Phosphatidylethanolamine (Pe) | 0.96 | 8.62E-01 | 7.51E-01 |           |
| 1-oleoyl-2-linoleoyl-GPE (18:1/18:2)*             | Lipid | Phosphatidylethanolamine (Pe) | 1.27 | 4.29E-01 | 1.96E-01 | HMDB05349 |
| 1-palmitoyl-2-arachidonoyl-GPE (16:0/20:4)*       | Lipid | Phosphatidylethanolamine (Pe) | 1.18 | 1.54E-01 | 2.72E-02 | HMDB05323 |
| 1-palmitoyl-2-docosahexaenoyl-GPE (16:0/22:6)*    | Lipid | Phosphatidylethanolamine (Pe) | 0.97 | 9.25E-01 | 8.47E-01 | HMDB05324 |
| 1-palmitoyl-2-linoleoyl-GPE (16:0/18:2)           | Lipid | Phosphatidylethanolamine (Pe) | 1.30 | 1.88E-01 | 3.59E-02 | HMDB05322 |
| 1-palmitoyl-2-oleoyl-GPE (16:0/18:1)              | Lipid | Phosphatidylethanolamine (Pe) | 1.25 | 2.00E-01 | 4.13E-02 | HMDB05320 |

|                                                        |       |                               |      |          |          |           |
|--------------------------------------------------------|-------|-------------------------------|------|----------|----------|-----------|
| 1-stearoyl-2-arachidonoyl-GPE (18:0/20:4)              | Lipid | Phosphatidylethanolamine (Pe) | 1.20 | 2.95E-02 | 2.59E-03 | HMDB09003 |
| 1-stearoyl-2-docosahexaenoyl-GPE (18:0/22:6)*          | Lipid | Phosphatidylethanolamine (Pe) | 0.97 | 9.83E-01 | 9.59E-01 | HMDB05334 |
| 1-stearoyl-2-linoleoyl-GPE (18:0/18:2)*                | Lipid | Phosphatidylethanolamine (Pe) | 1.21 | 3.25E-01 | 9.93E-02 | HMDB08994 |
| 1-stearoyl-2-oleoyl-GPE (18:0/18:1)                    | Lipid | Phosphatidylethanolamine (Pe) | 1.22 | 2.94E-01 | 8.03E-02 | HMDB08993 |
| 1-palmitoyl-2-arachidonoyl-GPI (16:0/20:4)*            | Lipid | Phosphatidylinositol (Pi)     | 1.10 | 5.17E-01 | 2.75E-01 | HMDB09789 |
| 1-palmitoyl-2-linoleoyl-GPI (16:0/18:2)                | Lipid | Phosphatidylinositol (Pi)     | 1.15 | 5.07E-01 | 2.64E-01 | HMDB09784 |
| 1-palmitoyl-2-oleoyl-GPI (16:0/18:1)*                  | Lipid | Phosphatidylinositol (Pi)     | 1.09 | 5.12E-01 | 2.69E-01 | HMDB09783 |
| 1-stearoyl-2-arachidonoyl-GPI (18:0/20:4)              | Lipid | Phosphatidylinositol (Pi)     | 1.01 | 7.23E-01 | 5.12E-01 | HMDB09815 |
| 1-stearoyl-2-linoleoyl-GPI (18:0/18:2)                 | Lipid | Phosphatidylinositol (Pi)     | 1.01 | 8.72E-01 | 7.64E-01 | HMDB09809 |
| 1-stearoyl-2-oleoyl-GPI (18:0/18:1)*                   | Lipid | Phosphatidylinositol (Pi)     | 0.92 | 7.64E-01 | 5.84E-01 |           |
| 1-stearoyl-2-arachidonoyl-GPS (18:0/20:4)              | Lipid | Phosphatidylserine (Ps)       | 7.47 | 3.82E-07 | 4.56E-09 | HMDB12383 |
| 1-stearoyl-2-oleoyl-GPS (18:0/18:1)                    | Lipid | Phosphatidylserine (Ps)       | 8.94 | 1.95E-09 | 1.03E-11 | HMDB10163 |
| choline                                                | Lipid | Phospholipid                  | 0.99 | 8.20E-01 | 6.71E-01 | HMDB00097 |
| choline phosphate                                      | Lipid | Phospholipid                  | 1.59 | 1.42E-07 | 1.50E-09 | HMDB01565 |
| glycerophosphoethanolamine                             | Lipid | Phospholipid                  | 1.10 | 1.43E-01 | 2.39E-02 | HMDB00114 |
| glycerophosphoinositol*                                | Lipid | Phospholipid                  | 1.57 | 1.12E-01 | 1.59E-02 |           |
| glycerophosphorylcholine (GPC)                         | Lipid | Phospholipid                  | 0.96 | 8.49E-01 | 7.12E-01 | HMDB00086 |
| phosphoethanolamine                                    | Lipid | Phospholipid                  | 2.61 | 9.92E-11 | 2.63E-13 | HMDB00224 |
| trimethylamine N-oxide                                 | Lipid | Phospholipid                  | 1.35 | 4.28E-01 | 1.94E-01 | HMDB00925 |
| 1-(1-enyl-palmitoyl)-2-arachidonoyl-GPC (P-16:0/20:4)* | Lipid | Plasmalogen                   | 0.84 | 6.45E-02 | 7.27E-03 | HMDB11220 |
| 1-(1-enyl-palmitoyl)-2-arachidonoyl-GPE (P-16:0/20:4)* | Lipid | Plasmalogen                   | 1.02 | 3.68E-01 | 1.42E-01 | HMDB11352 |
| 1-(1-enyl-palmitoyl)-2-linoleoyl-GPC (P-16:0/18:2)*    | Lipid | Plasmalogen                   | 0.82 | 1.24E-02 | 8.24E-04 | HMDB11211 |

|                                                        |       |                                    |      |          |          |           |
|--------------------------------------------------------|-------|------------------------------------|------|----------|----------|-----------|
| 1-(1-enyl-palmitoyl)-2-linoleoyl-GPE (P-16:0/18:2)*    | Lipid | Plasmalogen                        | 0.84 | 2.92E-01 | 7.85E-02 | HMDB11343 |
| 1-(1-enyl-palmitoyl)-2-oleoyl-GPC (P-16:0/18:1)*       | Lipid | Plasmalogen                        | 0.91 | 5.33E-01 | 2.94E-01 |           |
| 1-(1-enyl-palmitoyl)-2-oleoyl-GPE (P-16:0/18:1)*       | Lipid | Plasmalogen                        | 0.97 | 7.35E-01 | 5.33E-01 | HMDB11342 |
| 1-(1-enyl-palmitoyl)-2-palmitoleoyl-GPC (P-16:0/16:1)* | Lipid | Plasmalogen                        | 0.93 | 8.31E-01 | 6.81E-01 | HMDB11207 |
| 1-(1-enyl-palmitoyl)-2-palmitoyl-GPC (P-16:0/16:0)*    | Lipid | Plasmalogen                        | 0.93 | 6.21E-01 | 3.80E-01 | HMDB11206 |
| 1-(1-enyl-stearoyl)-2-arachidonoyl-GPE (P-18:0/20:4)*  | Lipid | Plasmalogen                        | 0.99 | 5.41E-01 | 2.99E-01 | HMDB05779 |
| 1-(1-enyl-stearoyl)-2-linoleoyl-GPE (P-18:0/18:2)*     | Lipid | Plasmalogen                        | 0.93 | 7.84E-01 | 6.11E-01 | HMDB11376 |
| 1-(1-enyl-stearoyl)-2-oleoyl-GPE (P-18:0/18:1)         | Lipid | Plasmalogen                        | 0.98 | 7.19E-01 | 5.02E-01 | HMDB11375 |
| adrenate (22:4n6)                                      | Lipid | Polyunsaturated Fatty Acid (N3/N6) | 0.81 | 5.17E-01 | 2.77E-01 | HMDB02226 |
| arachidonate (20:4n6)                                  | Lipid | Polyunsaturated Fatty Acid (N3/N6) | 0.84 | 4.67E-01 | 2.32E-01 | HMDB01043 |
| dihomo-linoleate (20:2n6)                              | Lipid | Polyunsaturated Fatty Acid (N3/N6) | 0.81 | 3.32E-01 | 1.11E-01 | HMDB05060 |
| dihomo-linolenate (20:3n3 or n6)                       | Lipid | Polyunsaturated Fatty Acid (N3/N6) | 0.84 | 3.75E-01 | 1.49E-01 | HMDB02925 |
| docosadienoate (22:2n6)                                | Lipid | Polyunsaturated Fatty Acid (N3/N6) | 0.89 | 6.77E-01 | 4.32E-01 | HMDB61714 |
| docosahexaenoate (DHA; 22:6n3)                         | Lipid | Polyunsaturated Fatty Acid (N3/N6) | 0.69 | 2.82E-02 | 2.43E-03 | HMDB02183 |
| docosapentaenoate (n3 DPA; 22:5n3)                     | Lipid | Polyunsaturated Fatty Acid (N3/N6) | 0.77 | 3.03E-01 | 8.45E-02 | HMDB06528 |
| docosapentaenoate (n6 DPA; 22:5n6)                     | Lipid | Polyunsaturated Fatty Acid (N3/N6) | 0.80 | 3.31E-01 | 1.10E-01 | HMDB01976 |
| docosatrienoate (22:3n3)                               | Lipid | Polyunsaturated Fatty Acid (N3/N6) | 0.85 | 6.76E-01 | 4.29E-01 | HMDB02823 |
| docosatrienoate (22:3n6)*                              | Lipid | Polyunsaturated Fatty Acid (N3/N6) | 0.73 | 4.85E-01 | 2.46E-01 |           |
| eicosapentaenoate (EPA; 20:5n3)                        | Lipid | Polyunsaturated Fatty Acid (N3/N6) | 0.68 | 4.21E-02 | 4.39E-03 | HMDB01999 |

|                                                       |       |                                    |      |          |          |           |
|-------------------------------------------------------|-------|------------------------------------|------|----------|----------|-----------|
| hexadecadienoate (16:2n6)                             | Lipid | Polyunsaturated Fatty Acid (N3/N6) | 0.75 | 2.65E-01 | 6.69E-02 | HMDB00477 |
| linoleate (18:2n6)                                    | Lipid | Polyunsaturated Fatty Acid (N3/N6) | 0.77 | 7.26E-02 | 9.04E-03 | HMDB00673 |
| linolenate [alpha or gamma; (18:3n3 or 6)]            | Lipid | Polyunsaturated Fatty Acid (N3/N6) | 0.76 | 1.56E-01 | 2.79E-02 | HMDB03073 |
| nisinate (24:6n3)                                     | Lipid | Polyunsaturated Fatty Acid (N3/N6) | 0.80 | 5.29E-01 | 2.89E-01 | HMDB02007 |
| stearidonate (18:4n3)                                 | Lipid | Polyunsaturated Fatty Acid (N3/N6) | 0.85 | 7.19E-01 | 4.96E-01 | HMDB06547 |
| 17alpha-hydroxypregnenolone 3-sulfate                 | Lipid | Pregnenolone Steroids              | 1.44 | 4.85E-01 | 2.45E-01 | HMDB00416 |
| 21-hydroxypregnenolone disulfate                      | Lipid | Pregnenolone Steroids              | 1.36 | 4.18E-01 | 1.87E-01 |           |
| pregnenolone sulfate                                  | Lipid | Pregnenolone Steroids              | 1.28 | 6.66E-01 | 4.20E-01 | HMDB00774 |
| chenodeoxycholate                                     | Lipid | Primary Bile Acid                  | 0.86 | 7.84E-01 | 6.10E-01 | HMDB00518 |
| cholate                                               | Lipid | Primary Bile Acid                  | 0.69 | 6.86E-01 | 4.47E-01 | HMDB00619 |
| glycochenodeoxycholate                                | Lipid | Primary Bile Acid                  | 1.15 | 6.93E-01 | 4.64E-01 | HMDB00637 |
| glycochenodeoxycholate glucuronide (1)                | Lipid | Primary Bile Acid                  | 1.29 | 4.23E-01 | 1.89E-01 |           |
| glycochenodeoxycholate sulfate                        | Lipid | Primary Bile Acid                  | 1.12 | 7.23E-01 | 5.12E-01 |           |
| glycocholate                                          | Lipid | Primary Bile Acid                  | 1.00 | 9.48E-01 | 8.95E-01 | HMDB00138 |
| tauro-beta-muricholate                                | Lipid | Primary Bile Acid                  | 0.95 | 9.46E-01 | 8.88E-01 | HMDB00932 |
| taurochenodeoxycholate                                | Lipid | Primary Bile Acid                  | 1.17 | 8.59E-01 | 7.40E-01 | HMDB00951 |
| taurocholate                                          | Lipid | Primary Bile Acid                  | 0.97 | 9.98E-01 | 9.90E-01 | HMDB00036 |
| 5alpha-pregnan-3(alpha or beta),20beta-diol disulfate | Lipid | Progestin Steroids                 | 2.43 | 1.54E-01 | 2.71E-02 |           |
| 5alpha-pregnan-3beta,20alpha-diol disulfate           | Lipid | Progestin Steroids                 | 1.58 | 3.68E-01 | 1.43E-01 |           |
| 5alpha-pregnan-3beta,20alpha-diol monosulfate (2)     | Lipid | Progestin Steroids                 | 1.16 | 9.83E-01 | 9.58E-01 |           |
| 5alpha-pregnan-3beta,20beta-diol monosulfate (1)      | Lipid | Progestin Steroids                 | 1.35 | 5.49E-01 | 3.08E-01 |           |
| pregn steroid monosulfate C21H34O5S*                  | Lipid | Progestin Steroids                 | 1.16 | 8.75E-01 | 7.70E-01 |           |
| pregnenediol-3-glucuronide                            | Lipid | Progestin Steroids                 | 1.62 | 4.85E-01 | 2.47E-01 | HMDB10318 |

|                                                |       |                     |      |          |          |           |
|------------------------------------------------|-------|---------------------|------|----------|----------|-----------|
| pregnanolone/allopregnanolone sulfate          | Lipid | Progestin Steroids  | 1.91 | 2.68E-01 | 6.80E-02 |           |
| pregnen-diol disulfate C21H34O8S2*             | Lipid | Progestin Steroids  | 1.50 | 3.71E-01 | 1.45E-01 |           |
| 3b-hydroxy-5-cholenoic acid deoxycholate       | Lipid | Secondary Bile Acid | 1.19 | 7.35E-01 | 5.43E-01 | HMDB00308 |
| glycocholenate sulfate*                        | Lipid | Secondary Bile Acid | 1.25 | 7.43E-01 | 5.59E-01 | HMDB00626 |
| glycodeoxycholate                              | Lipid | Secondary Bile Acid | 1.13 | 5.29E-01 | 2.89E-01 |           |
| glycodeoxycholate glucuronide (1)              | Lipid | Secondary Bile Acid | 1.21 | 4.36E-01 | 2.01E-01 | HMDB00631 |
| glycodeoxycholate sulfate                      | Lipid | Secondary Bile Acid | 1.44 | 4.03E-01 | 1.75E-01 |           |
| glycohyocholate                                | Lipid | Secondary Bile Acid | 1.28 | 5.33E-01 | 2.94E-01 |           |
| glycolithocholate                              | Lipid | Secondary Bile Acid | 0.77 | 9.65E-01 | 9.29E-01 |           |
| glycolithocholate sulfate*                     | Lipid | Secondary Bile Acid | 1.56 | 2.33E-01 | 5.38E-02 | HMDB00698 |
| glycoursodeoxycholate                          | Lipid | Secondary Bile Acid | 1.38 | 4.88E-01 | 2.51E-01 | HMDB02639 |
| hyocholate                                     | Lipid | Secondary Bile Acid | 1.10 | 5.17E-01 | 2.74E-01 | HMDB00708 |
| isoursodeoxycholate                            | Lipid | Secondary Bile Acid | 0.85 | 8.19E-01 | 6.59E-01 | HMDB00760 |
| taurocholenate sulfate                         | Lipid | Secondary Bile Acid | 1.17 | 6.76E-01 | 4.30E-01 | HMDB00686 |
| taurodeoxycholate                              | Lipid | Secondary Bile Acid | 1.01 | 9.06E-01 | 8.14E-01 |           |
| taurolithocholate 3-sulfate                    | Lipid | Secondary Bile Acid | 1.19 | 6.15E-01 | 3.73E-01 | HMDB00896 |
| tauroursodeoxycholate                          | Lipid | Secondary Bile Acid | 1.06 | 9.98E-01 | 9.98E-01 | HMDB02580 |
| ursodeoxycholate                               | Lipid | Secondary Bile Acid | 1.34 | 6.66E-01 | 4.17E-01 | HMDB00874 |
| ursodeoxycholate sulfate (1)                   | Lipid | Secondary Bile Acid | 1.17 | 8.91E-01 | 7.95E-01 | HMDB00946 |
| behenoyl dihydrosphingomyelin (d18:0/22:0)*    | Lipid | Sphingolipid        | 1.42 | 5.17E-01 | 2.74E-01 |           |
| behenoyl sphingomyelin (d18:1/22:0)*           | Lipid | Sphingolipid        | 0.96 | 8.67E-01 | 7.58E-01 | HMDB12091 |
| lactosyl-N-behenoyl-sphingosine (d18:1/22:0)*  | Lipid | Sphingolipid        | 0.98 | 9.53E-01 | 9.08E-01 | HMDB12103 |
| lignoceroyl sphingomyelin (d18:1/24:0)         | Lipid | Sphingolipid        | 1.48 | 3.14E-03 | 1.50E-04 |           |
| myristoyl dihydrosphingomyelin (d18:0/14:0)*   | Lipid | Sphingolipid        | 0.96 | 7.43E-01 | 5.53E-01 |           |
| N-behenoyl-sphingadienine (d18:2/22:0)*        | Lipid | Sphingolipid        | 0.95 | 7.62E-01 | 5.81E-01 | HMDB12085 |
| N-palmitoyl-heptadecasphingosine (d17:1/16:0)* | Lipid | Sphingolipid        | 0.85 | 7.31E-01 | 5.21E-01 |           |
|                                                |       |                     | 1.08 | 5.03E-01 | 2.61E-01 |           |



|                                                     |       |              |      |          |          |           |
|-----------------------------------------------------|-------|--------------|------|----------|----------|-----------|
| N-palmitoyl-sphingadienine (d18:2/16:0)*            | Lipid | Sphingolipid | 1.04 | 3.53E-01 | 1.30E-01 |           |
| N-palmitoyl-sphinganine (d18:0/16:0)                | Lipid | Sphingolipid | 1.14 | 3.76E-01 | 1.51E-01 | HMDB11760 |
| palmitoyl dihydrosphingomyelin (d18:0/16:0)*        | Lipid | Sphingolipid | 0.98 | 9.76E-01 | 9.41E-01 |           |
| palmitoyl sphingomyelin (d18:1/16:0)                | Lipid | Sphingolipid | 1.02 | 3.79E-01 | 1.56E-01 |           |
| sphinganine                                         | Lipid | Sphingolipid | 1.53 | 3.14E-03 | 1.55E-04 | HMDB00269 |
| sphinganine-1-phosphate                             | Lipid | Sphingolipid | 1.02 | 6.15E-01 | 3.74E-01 | HMDB01383 |
| sphingomyelin (d17:1/16:0, d18:1/15:0, d16:1/17:0)* | Lipid | Sphingolipid | 0.96 | 8.72E-01 | 7.64E-01 |           |
| sphingomyelin (d17:2/16:0, d18:2/15:0)*             | Lipid | Sphingolipid | 0.88 | 3.84E-01 | 1.61E-01 |           |
| sphingomyelin (d18:0/18:0, d19:0/17:0)*             | Lipid | Sphingolipid | 1.00 | 7.23E-01 | 5.12E-01 | HMDB12087 |
| sphingomyelin (d18:0/20:0, d16:0/22:0)*             | Lipid | Sphingolipid | 0.95 | 9.47E-01 | 8.92E-01 |           |
| sphingomyelin (d18:1/14:0, d16:1/16:0)*             | Lipid | Sphingolipid | 0.96 | 8.34E-01 | 6.86E-01 | HMDB12097 |
| sphingomyelin (d18:1/17:0, d17:1/18:0, d19:1/16:0)  | Lipid | Sphingolipid | 0.96 | 8.99E-01 | 8.05E-01 |           |
| sphingomyelin (d18:1/18:1, d18:2/18:0)              | Lipid | Sphingolipid | 0.98 | 8.59E-01 | 7.44E-01 | HMDB12101 |
| sphingomyelin (d18:1/19:0, d19:1/18:0)*             | Lipid | Sphingolipid | 0.91 | 7.31E-01 | 5.25E-01 |           |
| sphingomyelin (d18:1/20:0, d16:1/22:0)*             | Lipid | Sphingolipid | 0.94 | 6.66E-01 | 4.19E-01 | HMDB12102 |
| sphingomyelin (d18:1/20:1, d18:2/20:0)*             | Lipid | Sphingolipid | 0.95 | 8.94E-01 | 7.99E-01 |           |
| sphingomyelin (d18:1/20:2, d18:2/20:1, d16:1/22:2)* | Lipid | Sphingolipid | 0.97 | 8.90E-01 | 7.93E-01 |           |
| sphingomyelin (d18:1/21:0, d17:1/22:0, d16:1/23:0)* | Lipid | Sphingolipid | 0.85 | 2.01E-01 | 4.21E-02 |           |
| sphingomyelin (d18:1/22:1, d18:2/22:0, d16:1/24:1)* | Lipid | Sphingolipid | 0.94 | 4.65E-01 | 2.26E-01 | HMDB12104 |
| sphingomyelin (d18:1/22:2, d18:2/22:1, d16:1/24:2)* | Lipid | Sphingolipid | 0.98 | 9.16E-01 | 8.32E-01 |           |

|                                                                 |            |                                          |      |          |          |           |
|-----------------------------------------------------------------|------------|------------------------------------------|------|----------|----------|-----------|
| sphingomyelin (d18:1/24:1, d18:2/24:0)*                         | Lipid      | Sphingolipid                             | 1.00 | 7.47E-01 | 5.63E-01 | HMDB12107 |
| sphingomyelin (d18:1/25:0, d19:0/24:1, d20:1/23:0, d19:1/24:0)* | Lipid      | Sphingolipid                             | 0.88 | 3.50E-01 | 1.27E-01 |           |
| sphingomyelin (d18:2/14:0, d18:1/14:1)*                         | Lipid      | Sphingolipid                             | 0.94 | 7.35E-01 | 5.41E-01 |           |
| sphingomyelin (d18:2/16:0, d18:1/16:1)*                         | Lipid      | Sphingolipid                             | 1.03 | 4.49E-01 | 2.13E-01 |           |
| sphingomyelin (d18:2/18:1)*                                     | Lipid      | Sphingolipid                             | 0.97 | 9.46E-01 | 8.88E-01 |           |
| sphingomyelin (d18:2/21:0, d16:2/23:0)*                         | Lipid      | Sphingolipid                             | 0.88 | 4.13E-01 | 1.83E-01 |           |
| sphingomyelin (d18:2/23:0, d18:1/23:1, d17:1/24:1)*             | Lipid      | Sphingolipid                             | 0.91 | 3.79E-01 | 1.54E-01 |           |
| sphingomyelin (d18:2/23:1)*                                     | Lipid      | Sphingolipid                             | 0.93 | 6.91E-01 | 4.59E-01 |           |
| sphingomyelin (d18:2/24:1, d18:1/24:2)*                         | Lipid      | Sphingolipid                             | 1.01 | 6.91E-01 | 4.56E-01 |           |
| sphingomyelin (d18:2/24:2)*                                     | Lipid      | Sphingolipid                             | 1.07 | 5.07E-01 | 2.64E-01 |           |
| sphingosine                                                     | Lipid      | Sphingolipid                             | 1.38 | 2.57E-03 | 1.16E-04 | HMDB00252 |
| sphingosine 1-phosphate                                         | Lipid      | Sphingolipid                             | 1.04 | 3.76E-01 | 1.50E-01 | HMDB00277 |
| stearoyl sphingomyelin (d18:1/18:0)                             | Lipid      | Sphingolipid                             | 0.98 | 8.14E-01 | 6.46E-01 | HMDB01348 |
| tricosanoyl sphingomyelin (d18:1/23:0)*                         | Lipid      | Sphingolipid                             | 0.88 | 1.57E-01 | 2.87E-02 | HMDB12105 |
| 3beta,7alpha-dihydroxy-5-cholestenoate                          | Lipid      | Sterol                                   | 0.88 | 1.12E-01 | 1.57E-02 |           |
| 3beta,7beta-dihydroxy-5-cholestenoate                           | Lipid      | Sterol                                   | 1.17 | 3.31E-01 | 1.09E-01 |           |
| 3beta-hydroxy-5-cholestenoate                                   | Lipid      | Sterol                                   | 0.89 | 3.79E-01 | 1.55E-01 |           |
| 7-alpha-hydroxy-3-oxo-4-cholestenoate (7-Hoca)                  | Lipid      | Sterol                                   | 0.86 | 9.79E-02 | 1.34E-02 | HMDB12458 |
| cholesterol                                                     | Lipid      | Sterol                                   | 1.08 | 3.87E-01 | 1.63E-01 | HMDB00067 |
| allantoin                                                       | Nucleotide | Purine/(Hypo)Xanthine/Inosine Containing | 1.09 | 1.40E-01 | 2.28E-02 | HMDB00462 |
| hypoxanthine                                                    | Nucleotide | Purine/(Hypo)Xanthine/Inosine Containing | 1.30 | 3.46E-01 | 1.21E-01 | HMDB00157 |
| inosine                                                         | Nucleotide | Purine/(Hypo)Xanthine/Inosine Containing | 4.11 | 1.14E-01 | 1.63E-02 | HMDB00195 |

|                                             |            |                                          |      |          |          |           |
|---------------------------------------------|------------|------------------------------------------|------|----------|----------|-----------|
| N1-methylinosine                            | Nucleotide | Purine/(Hypo)Xanthine/Inosine Containing | 1.46 | 5.90E-03 | 3.52E-04 | HMDB02721 |
| urate                                       | Nucleotide | Purine/(Hypo)Xanthine/Inosine Containing | 1.00 | 4.39E-01 | 2.06E-01 | HMDB00289 |
| xanthine                                    | Nucleotide | Purine/(Hypo)Xanthine/Inosine Containing | 0.64 | 3.63E-01 | 1.39E-01 | HMDB00292 |
| adenine                                     | Nucleotide | Purine/Adenine Containing                | 1.12 | 7.23E-01 | 5.12E-01 | HMDB00034 |
| adenosine                                   | Nucleotide | Purine/Adenine Containing                | 1.80 | 1.78E-02 | 1.34E-03 | HMDB00050 |
| adenosine 3',5'-cyclic monophosphate (cAMP) | Nucleotide | Purine/Adenine Containing                | 1.10 | 6.12E-01 | 3.70E-01 | HMDB00058 |
| adenosine 5'-monophosphate (AMP)            | Nucleotide | Purine/Adenine Containing                | 2.52 | 1.74E-02 | 1.29E-03 | HMDB00045 |
| N1-methyladenosine                          | Nucleotide | Purine/Adenine Containing                | 1.06 | 8.64E-02 | 1.16E-02 | HMDB03331 |
| N6-carbamoylthreonyladenosine               | Nucleotide | Purine/Adenine Containing                | 1.13 | 1.41E-01 | 2.34E-02 | HMDB41623 |
| N6-succinyladenosine                        | Nucleotide | Purine/Guanine Containing                | 1.10 | 7.15E-01 | 4.91E-01 | HMDB00912 |
| 7-methylguanine                             | Nucleotide | Purine/Guanine Containing                | 1.00 | 6.81E-01 | 4.41E-01 | HMDB00897 |
| N2,N2-dimethylguanosine                     | Nucleotide | Pyrimidine/Cytidine Containing           | 1.16 | 6.86E-02 | 8.01E-03 | HMDB04824 |
| 2'-O-methylcytidine                         | Nucleotide | Pyrimidine/Cytidine Containing           | 0.96 | 9.10E-01 | 8.25E-01 |           |
| 3-methylcytidine                            | Nucleotide | Pyrimidine/Cytidine Containing           | 1.03 | 6.93E-01 | 4.63E-01 |           |
| cytidine                                    | Nucleotide | Pyrimidine/Cytidine Containing           | 1.84 | 3.11E-01 | 9.18E-02 | HMDB00089 |
| cytosine                                    | Nucleotide | Pyrimidine/Cytidine Containing           | 1.44 | 2.81E-01 | 7.24E-02 | HMDB00630 |
| N4-acetylcytidine                           | Nucleotide | Pyrimidine/Orotate Containing            | 1.26 | 1.15E-01 | 1.69E-02 | HMDB05923 |
| dihydroorotate                              | Nucleotide | Pyrimidine/Orotate Containing            | 0.55 | 1.80E-03 | 7.18E-05 | HMDB03349 |
| orotate                                     | Nucleotide | Pyrimidine/Orotate Containing            | 0.61 | 3.87E-01 | 1.64E-01 | HMDB00226 |

|                                 |            |                                                        |      |          |          |           |
|---------------------------------|------------|--------------------------------------------------------|------|----------|----------|-----------|
| orotidine                       | Nucleotide | Pyrimidine/Orotate<br>Containing<br>Pyrimidine/Thymine | 0.56 | 6.41E-01 | 3.99E-01 | HMDB00788 |
| 3-aminoisobutyrate              | Nucleotide | Containing<br>Pyrimidine/Thymine                       | 1.00 | 6.18E-01 | 3.77E-01 | HMDB03911 |
| 5,6-dihydrothymine              | Nucleotide | Containing<br>Pyrimidine/Uracil                        | 1.00 | 7.35E-01 | 5.37E-01 | HMDB00079 |
| 2'-deoxyuridine                 | Nucleotide | Containing<br>Pyrimidine/Uracil                        | 0.65 | 1.62E-03 | 6.02E-05 | HMDB00012 |
| 2'-O-methyluridine              | Nucleotide | Containing<br>Pyrimidine/Uracil                        | 1.02 | 8.49E-01 | 7.10E-01 |           |
| 3-ureidopropionate              | Nucleotide | Containing<br>Pyrimidine/Uracil                        | 1.04 | 7.62E-01 | 5.81E-01 | HMDB00026 |
| 5-methyluridine (ribothymidine) | Nucleotide | Containing<br>Pyrimidine/Uracil                        | 0.96 | 8.86E-01 | 7.86E-01 | HMDB00884 |
| beta-alanine                    | Nucleotide | Containing<br>Pyrimidine/Uracil                        | 1.12 | 4.04E-01 | 1.77E-01 | HMDB00056 |
| N-acetyl-beta-alanine           | Nucleotide | Containing<br>Pyrimidine/Uracil                        | 0.91 | 7.31E-01 | 5.21E-01 |           |
| pseudouridine                   | Nucleotide | Containing<br>Pyrimidine/Uracil                        | 1.14 | 1.01E-01 | 1.39E-02 | HMDB00767 |
| uracil                          | Nucleotide | Containing<br>Pyrimidine/Uracil                        | 1.14 | 7.23E-01 | 5.10E-01 | HMDB00300 |
| uridine                         | Nucleotide | Containing                                             | 0.89 | 3.49E-01 | 1.26E-01 | HMDB00296 |
| 4-hydroxyphenylacetylglutamine  | Peptide    | Acetylated Peptides                                    | 1.37 | 3.31E-01 | 1.06E-01 |           |
| phenylacetylcarnitine           | Peptide    | Acetylated Peptides                                    | 1.42 | 2.48E-01 | 5.95E-02 |           |
| phenylacetylglutaminate         | Peptide    | Acetylated Peptides                                    | 1.65 | 2.58E-01 | 6.36E-02 | HMDB59772 |
| phenylacetylglutamine           | Peptide    | Acetylated Peptides                                    | 1.48 | 6.48E-02 | 7.40E-03 | HMDB06344 |
| phenylacetyl glycine            | Peptide    | Acetylated Peptides                                    | 1.46 | 1.20E-01 | 1.88E-02 | HMDB00821 |
| isoleucylglycine                | Peptide    | Dipeptide                                              | 1.00 | 9.48E-01 | 8.98E-01 | HMDB28907 |
| prolylglycine                   | Peptide    | Dipeptide                                              | 0.84 | 6.91E-01 | 4.56E-01 | HMDB11178 |
| gamma-glutamyl-2-aminobutyrate  | Peptide    | Gamma-Glutamyl<br>Amino Acid                           | 0.64 | 2.10E-02 | 1.64E-03 |           |
| gamma-glutamyl-alpha-lysine     | Peptide    | Gamma-Glutamyl<br>Amino Acid                           | 1.00 | 9.28E-01 | 8.54E-01 |           |
| gamma-glutamyl-epsilon-lysine   | Peptide    | Gamma-Glutamyl<br>Amino Acid                           | 0.96 | 8.19E-01 | 6.61E-01 | HMDB03869 |

|                                          |             |                              |      |          |          |           |
|------------------------------------------|-------------|------------------------------|------|----------|----------|-----------|
| gamma-glutamylalanine                    | Peptide     | Gamma-Glutamyl<br>Amino Acid | 0.85 | 6.08E-01 | 3.64E-01 | HMDB29142 |
| gamma-glutamylglutamate                  | Peptide     | Gamma-Glutamyl<br>Amino Acid | 1.04 | 5.17E-01 | 2.79E-01 | HMDB11737 |
| gamma-glutamylglutamine                  | Peptide     | Gamma-Glutamyl<br>Amino Acid | 1.05 | 3.86E-01 | 1.62E-01 | HMDB11738 |
| gamma-glutamylglycine                    | Peptide     | Gamma-Glutamyl<br>Amino Acid | 1.02 | 4.29E-01 | 1.95E-01 | HMDB11667 |
| gamma-glutamylhistidine                  | Peptide     | Gamma-Glutamyl<br>Amino Acid | 1.00 | 8.63E-01 | 7.53E-01 |           |
| gamma-glutamylisoleucine*                | Peptide     | Gamma-Glutamyl<br>Amino Acid | 1.09 | 4.13E-01 | 1.83E-01 | HMDB11170 |
| gamma-glutamylleucine                    | Peptide     | Gamma-Glutamyl<br>Amino Acid | 0.99 | 9.44E-01 | 8.80E-01 | HMDB11171 |
| gamma-glutamylmethionine                 | Peptide     | Gamma-Glutamyl<br>Amino Acid | 1.00 | 9.06E-01 | 8.12E-01 | HMDB29155 |
| gamma-glutamylphenylalanine              | Peptide     | Gamma-Glutamyl<br>Amino Acid | 1.04 | 4.39E-01 | 2.06E-01 | HMDB00594 |
| gamma-glutamylthreonine                  | Peptide     | Gamma-Glutamyl<br>Amino Acid | 0.97 | 9.98E-01 | 9.88E-01 | HMDB29159 |
| gamma-glutamyltryptophan                 | Peptide     | Gamma-Glutamyl<br>Amino Acid | 0.85 | 1.32E-02 | 8.91E-04 | HMDB29160 |
| gamma-glutamyltyrosine                   | Peptide     | Gamma-Glutamyl<br>Amino Acid | 0.96 | 7.31E-01 | 5.21E-01 | HMDB11741 |
| gamma-glutamylvaline                     | Peptide     | Gamma-Glutamyl<br>Amino Acid | 1.08 | 3.61E-01 | 1.36E-01 | HMDB11172 |
| N-methylpipercolate                      | Xenobiotics | Bacterial/Fungal             | 1.19 | 3.46E-01 | 1.24E-01 |           |
| tartronate (hydroxymalonate)             | Xenobiotics | Bacterial/Fungal             | 0.98 | 8.55E-01 | 7.27E-01 | HMDB35227 |
| 2-hydroxyhippurate (salicylurate)        | Xenobiotics | Benzoate                     | 2.49 | 6.04E-01 | 3.59E-01 | HMDB00840 |
| 3-(3-hydroxyphenyl)propionate            | Xenobiotics | Benzoate                     | 0.68 | 5.74E-01 | 3.34E-01 | HMDB00375 |
| 3-(3-hydroxyphenyl)propionate<br>sulfate | Xenobiotics | Benzoate                     | 0.61 | 2.86E-01 | 7.54E-02 |           |
| 3-hydroxyhippurate                       | Xenobiotics | Benzoate                     | 0.73 | 6.86E-01 | 4.48E-01 | HMDB06116 |
| 3-methoxycatechol sulfate (1)            | Xenobiotics | Benzoate                     | 0.66 | 3.31E-01 | 1.07E-01 |           |
| 3-methyl catechol sulfate (1)            | Xenobiotics | Benzoate                     | 0.72 | 2.81E-01 | 7.32E-02 |           |
| 3-phenylpropionate<br>(hydrocinnamate)   | Xenobiotics | Benzoate                     | 0.89 | 4.36E-01 | 2.02E-01 | HMDB00764 |
| 4-ethylphenylsulfate                     | Xenobiotics | Benzoate                     | 1.57 | 6.03E-01 | 3.58E-01 |           |

|                                        |             |          |      |          |          |           |
|----------------------------------------|-------------|----------|------|----------|----------|-----------|
| 4-hydroxyhippurate                     | Xenobiotics | Benzoate | 1.33 | 3.61E-01 | 1.36E-01 | HMDB13678 |
| 4-methylcatechol sulfate               | Xenobiotics | Benzoate | 1.09 | 8.49E-01 | 7.11E-01 |           |
| 4-vinylphenol sulfate                  | Xenobiotics | Benzoate | 0.92 | 7.19E-01 | 5.02E-01 | HMDB04072 |
| benzoate                               | Xenobiotics | Benzoate | 0.73 | 1.12E-04 | 3.72E-06 | HMDB01870 |
| catechol sulfate                       | Xenobiotics | Benzoate | 0.86 | 5.53E-01 | 3.13E-01 | HMDB59724 |
| hippurate                              | Xenobiotics | Benzoate | 1.07 | 9.80E-01 | 9.50E-01 | HMDB00714 |
| methyl-4-hydroxybenzoate sulfate       | Xenobiotics | Benzoate | 2.28 | 5.88E-01 | 3.46E-01 |           |
| o-cresol sulfate                       | Xenobiotics | Benzoate | 0.54 | 7.26E-02 | 9.02E-03 |           |
| O-methylcatechol sulfate               | Xenobiotics | Benzoate | 0.93 | 7.72E-01 | 5.96E-01 | HMDB60013 |
| p-cresol sulfate                       | Xenobiotics | Benzoate | 1.34 | 1.18E-01 | 1.82E-02 | HMDB11635 |
| 1,2,3-benzenetriol sulfate (2)         | Xenobiotics | Chemical | 0.80 | 7.35E-01 | 5.33E-01 |           |
| 2-aminophenol sulfate                  | Xenobiotics | Chemical | 1.38 | 2.86E-01 | 7.60E-02 | HMDB61116 |
| 2-methoxyresorcinol sulfate            | Xenobiotics | Chemical | 1.47 | 7.50E-01 | 5.66E-01 |           |
| 3-acetylphenol sulfate                 | Xenobiotics | Chemical | 0.72 | 5.54E-01 | 3.16E-01 |           |
| 3-hydroxyindolin-2-one sulfate         | Xenobiotics | Chemical | 1.54 | 1.44E-01 | 2.44E-02 |           |
| 3-hydroxypyridine sulfate              | Xenobiotics | Chemical | 0.77 | 4.39E-01 | 2.06E-01 |           |
| 4-hydroxychlorothalonil                | Xenobiotics | Chemical | 0.75 | 1.48E-02 | 1.04E-03 |           |
| 4-methylbenzenesulfonate               | Xenobiotics | Chemical | 0.73 | 3.42E-02 | 3.36E-03 |           |
| 6-hydroxyindole sulfate                | Xenobiotics | Chemical | 1.32 | 3.03E-01 | 8.68E-02 |           |
| dimethyl sulfone                       | Xenobiotics | Chemical | 0.66 | 5.12E-01 | 2.69E-01 | HMDB04983 |
| dimethyl sulfoxide (DMSO)              | Xenobiotics | Chemical | 0.97 | 8.19E-01 | 6.63E-01 | HMDB02151 |
| ectoine                                | Xenobiotics | Chemical | 1.48 | 3.14E-01 | 9.48E-02 |           |
| EDTA                                   | Xenobiotics | Chemical | 1.04 | 1.98E-01 | 4.07E-02 | HMDB15109 |
| iminodiacetate (IDA)                   | Xenobiotics | Chemical | 1.19 | 3.13E-05 | 9.15E-07 | HMDB11753 |
| lanthionine                            | Xenobiotics | Chemical | 1.11 | 5.74E-01 | 3.34E-01 |           |
| O-sulfo-L-tyrosine                     | Xenobiotics | Chemical | 1.15 | 2.17E-01 | 4.67E-02 |           |
| perfluorooctanesulfonic acid<br>(PFOS) | Xenobiotics | Chemical | 1.15 | 7.94E-01 | 6.26E-01 | HMDB59586 |
| succinimide                            | Xenobiotics | Chemical | 0.93 | 7.64E-01 | 5.85E-01 |           |
| sulfate*                               | Xenobiotics | Chemical | 0.99 | 8.19E-01 | 6.66E-01 | HMDB01448 |
| thioproline                            | Xenobiotics | Chemical | 1.16 | 8.69E-03 | 5.53E-04 |           |
| 2-acetamidophenol sulfate              | Xenobiotics | Drug     | 2.08 | 1.88E-01 | 3.75E-02 |           |
| 4-acetaminophen sulfate                | Xenobiotics | Drug     | 9.54 | 2.81E-01 | 7.31E-02 | HMDB59911 |
| 4-acetylphenol sulfate                 | Xenobiotics | Drug     | 1.05 | 9.53E-01 | 9.06E-01 |           |
| 4-hydroxycoumarin                      | Xenobiotics | Drug     | 1.22 | 7.13E-01 | 4.87E-01 |           |
| hydroquinone sulfate                   | Xenobiotics | Drug     | 1.29 | 6.15E-01 | 3.74E-01 | HMDB02434 |

|                                       |             |                 |      |          |          |           |
|---------------------------------------|-------------|-----------------|------|----------|----------|-----------|
| salicylate                            | Xenobiotics | Drug            | 1.61 | 8.49E-01 | 7.13E-01 | HMDB01895 |
| salicyluric glucuronide*              | Xenobiotics | Drug            | 2.03 | 7.42E-01 | 5.51E-01 |           |
|                                       |             | Food            |      |          |          |           |
| 2,3-dihydroxyisovalerate              | Xenobiotics | Component/Plant | 0.53 | 3.83E-01 | 1.58E-01 | HMDB12141 |
|                                       |             | Food            |      |          |          |           |
| 2-keto-3-deoxy-gluconate              | Xenobiotics | Component/Plant | 0.78 | 3.31E-01 | 1.09E-01 | HMDB01353 |
|                                       |             | Food            |      |          |          |           |
| 2-piperidinone                        | Xenobiotics | Component/Plant | 2.05 | 2.42E-01 | 5.72E-02 | HMDB11749 |
|                                       |             | Food            |      |          |          |           |
| 3,4-methyleneheptanoate               | Xenobiotics | Component/Plant | 1.14 | 9.94E-01 | 9.81E-01 |           |
|                                       |             | Food            |      |          |          |           |
| 4-allylphenol sulfate                 | Xenobiotics | Component/Plant | 0.93 | 5.76E-01 | 3.38E-01 |           |
|                                       |             | Food            |      |          |          |           |
| 4-vinylguaiacol sulfate               | Xenobiotics | Component/Plant | 1.03 | 8.86E-01 | 7.87E-01 |           |
|                                       |             | Food            |      |          |          |           |
| beta-guanidinopropanoate              | Xenobiotics | Component/Plant | 0.87 | 9.52E-01 | 9.04E-01 | HMDB13222 |
|                                       |             | Food            |      |          |          |           |
| cinnamoylglycine                      | Xenobiotics | Component/Plant | 0.84 | 7.31E-01 | 5.27E-01 | HMDB11621 |
|                                       |             | Food            |      |          |          |           |
| dihydroferulic acid                   | Xenobiotics | Component/Plant | 0.71 | 5.53E-01 | 3.15E-01 |           |
|                                       |             | Food            |      |          |          |           |
| ergothioneine                         | Xenobiotics | Component/Plant | 0.58 | 2.23E-02 | 1.83E-03 | HMDB03045 |
|                                       |             | Food            |      |          |          |           |
| erythritol                            | Xenobiotics | Component/Plant | 1.04 | 7.19E-01 | 5.00E-01 | HMDB02994 |
|                                       |             | Food            |      |          |          |           |
| eugenol sulfate                       | Xenobiotics | Component/Plant | 2.32 | 5.17E-01 | 2.76E-01 |           |
|                                       |             | Food            |      |          |          |           |
| ferulic acid 4-sulfate                | Xenobiotics | Component/Plant | 1.03 | 9.25E-01 | 8.41E-01 | HMDB29200 |
|                                       |             | Food            |      |          |          |           |
| furaneol sulfate                      | Xenobiotics | Component/Plant | 1.24 | 7.35E-01 | 5.41E-01 |           |
|                                       |             | Food            |      |          |          |           |
| gluconate                             | Xenobiotics | Component/Plant | 1.12 | 3.26E-01 | 1.02E-01 | HMDB00625 |
|                                       |             | Food            |      |          |          |           |
| homostachydrine*                      | Xenobiotics | Component/Plant | 0.97 | 9.98E-01 | 9.96E-01 | HMDB33433 |
|                                       |             | Food            |      |          |          |           |
| indolin-2-one                         | Xenobiotics | Component/Plant | 1.65 | 1.40E-01 | 2.30E-02 |           |
|                                       |             | Food            |      |          |          |           |
| methyl glucopyranoside (alpha + beta) | Xenobiotics | Component/Plant | 0.72 | 3.31E-01 | 1.06E-01 |           |

|                                            |             |                         |      |          |          |           |
|--------------------------------------------|-------------|-------------------------|------|----------|----------|-----------|
| N-(2-furoyl)glycine                        | Xenobiotics | Food<br>Component/Plant | 0.79 | 7.31E-01 | 5.26E-01 | HMDB00439 |
| piperine                                   | Xenobiotics | Food<br>Component/Plant | 1.08 | 9.10E-01 | 8.22E-01 | HMDB29377 |
| pyrraline                                  | Xenobiotics | Food<br>Component/Plant | 1.03 | 9.48E-01 | 8.97E-01 | HMDB33143 |
| quinatate                                  | Xenobiotics | Food<br>Component/Plant | 0.70 | 2.18E-01 | 4.72E-02 | HMDB03072 |
| saccharin                                  | Xenobiotics | Food<br>Component/Plant | 4.81 | 2.44E-01 | 5.80E-02 | HMDB29723 |
| stachydrine                                | Xenobiotics | Food<br>Component/Plant | 0.89 | 9.28E-01 | 8.55E-01 | HMDB04827 |
| tartarate                                  | Xenobiotics | Food<br>Component/Plant | 0.60 | 3.11E-01 | 9.35E-02 | HMDB00956 |
| theanine                                   | Xenobiotics | Food<br>Component/Plant | 0.70 | 4.44E-01 | 2.09E-01 | HMDB34365 |
| thymol sulfate                             | Xenobiotics | Food<br>Component/Plant | 0.62 | 7.92E-01 | 6.23E-01 | HMDB01878 |
| umbelliferone sulfate                      | Xenobiotics | Component/Plant         | 2.43 | 4.85E-01 | 2.45E-01 |           |
| 1,3,7-trimethylurate                       | Xenobiotics | Xanthine                | 0.74 | 3.46E-01 | 1.21E-01 | HMDB02123 |
| 1,3-dimethylurate                          | Xenobiotics | Xanthine                | 0.71 | 1.44E-01 | 2.43E-02 | HMDB01857 |
| 1,7-dimethylurate                          | Xenobiotics | Xanthine                | 0.74 | 2.19E-01 | 4.76E-02 | HMDB11103 |
| 1-methylurate                              | Xenobiotics | Xanthine                | 0.80 | 4.39E-01 | 2.04E-01 | HMDB03099 |
| 1-methylxanthine                           | Xenobiotics | Xanthine                | 0.58 | 6.34E-03 | 3.87E-04 | HMDB10738 |
| 3,7-dimethylurate                          | Xenobiotics | Xanthine                | 0.93 | 9.48E-01 | 8.96E-01 | HMDB01982 |
| 3-methylxanthine                           | Xenobiotics | Xanthine                | 0.98 | 9.41E-01 | 8.77E-01 | HMDB01886 |
| 5-acetylamino-6-amino-3-methyluracil       | Xenobiotics | Xanthine                | 0.83 | 7.10E-01 | 4.79E-01 | HMDB04400 |
| 5-acetylamino-6-formylamino-3-methyluracil | Xenobiotics | Xanthine                | 0.84 | 8.57E-01 | 7.31E-01 | HMDB11105 |
| 7-methylurate                              | Xenobiotics | Xanthine                | 1.04 | 7.88E-01 | 6.18E-01 | HMDB11107 |
| 7-methylxanthine                           | Xenobiotics | Xanthine                | 0.89 | 9.10E-01 | 8.25E-01 | HMDB01991 |
| caffeic acid sulfate                       | Xenobiotics | Xanthine                | 0.54 | 3.42E-02 | 3.35E-03 | HMDB41708 |
| caffeine                                   | Xenobiotics | Xanthine                | 0.58 | 1.55E-02 | 1.11E-03 | HMDB01847 |
| paraxanthine                               | Xenobiotics | Xanthine                | 0.66 | 4.78E-02 | 5.13E-03 | HMDB01860 |
| theobromine                                | Xenobiotics | Xanthine                | 0.86 | 7.23E-01 | 5.12E-01 | HMDB02825 |



|              |             |          |      |          |          |           |
|--------------|-------------|----------|------|----------|----------|-----------|
| theophylline | Xenobiotics | Xanthine | 0.67 | 3.16E-02 | 2.93E-03 | HMDB01889 |
|--------------|-------------|----------|------|----------|----------|-----------|
